# Supplementary material for: C‐Functionalized Cationic Diazaoxatriangulenes: Late‐Stage Synthesis and Tuning of Physicochemical Properties
Source: PubMed Central journal article supplement — Chemistry. 2018 Jun 25;24(40):10186–95. doi: 10.1002/chem.201801486 (PMC6099254; doi:10.1002/chem.201801486), 2018-06-25
Supplement: CHEM-24-10186-s001.pdf [file CHEM-24-10186-s001.pdf]

# CHEMISTRY

## A **European** Journal

### Supporting Information

#### **C-Functionalized Cationic Diazaoxatriangulenes: Late-Stage Synthesis and Tuning of Physicochemical Properties**

Irene Hernández Delgado,<sup>[a]</sup> Simon Pascal,<sup>[a]</sup> Céline Besnard,<sup>[b]</sup> Silvia Voci,<sup>[c]</sup> Laurent Bouffier,<sup>[c]</sup> Neso Sojic,<sup>[c]</sup> and Jérôme Lacour\*<sup>[a]</sup>

chem\_201801486\_sm\_miscellaneous\_information.pdf

## TABLE OF CONTENT

|     |                                                                                                 |     |
|-----|-------------------------------------------------------------------------------------------------|-----|
| I.  | $^1\text{H}$ NMR, $^{13}\text{C}$ NMR, $^{19}\text{F}$ NMR, AND HRMS SPECTRA OF COMPOUNDS ..... | S2  |
| II. | X-RAY DIFFRACTION .....                                                                         | S20 |

# I. $^1\text{H}$ NMR, $^{13}\text{C}$ NMR, $^{19}\text{F}$ NMR, and HRMS spectra of compounds

## Compound 2

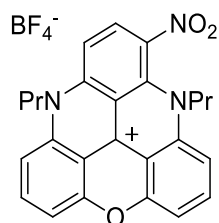

### $^1\text{H}$ NMR (400 MHz, $\text{CD}_2\text{Cl}_2$ )

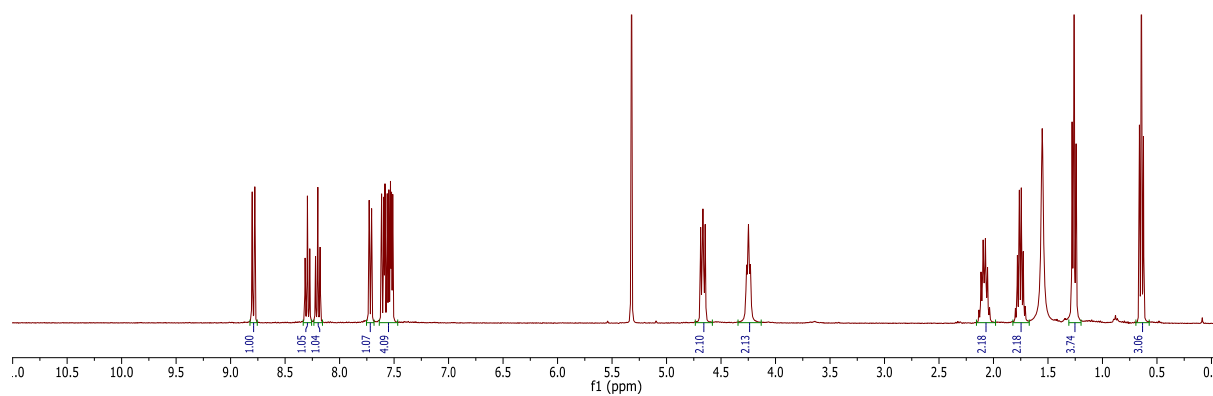

### $^{13}\text{C}$ NMR (101 MHz, $\text{CD}_2\text{Cl}_2$ )

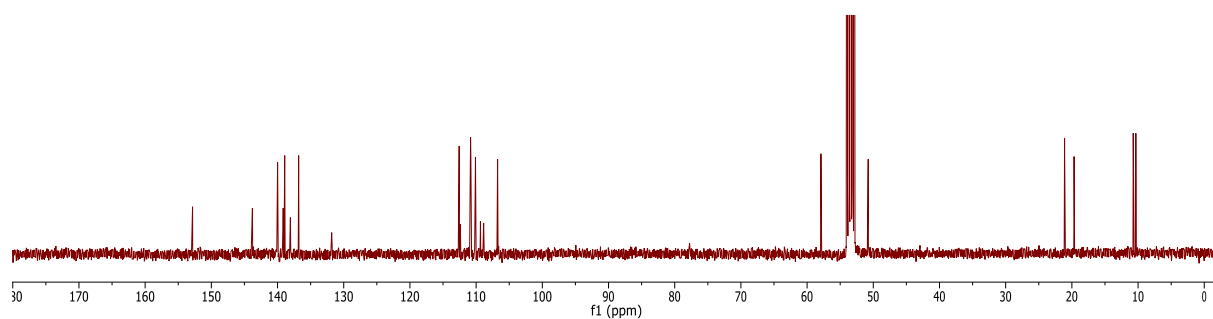

### $^{19}\text{F}$ NMR (282 MHz, $\text{CD}_3\text{CN}$ )

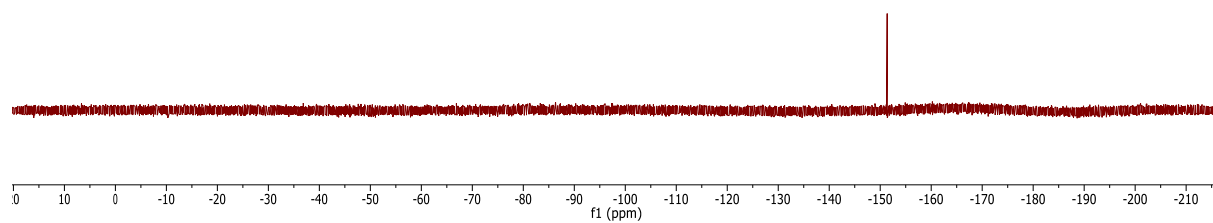

|                         |                     |                      |                             |
|-------------------------|---------------------|----------------------|-----------------------------|
| Submitter:              | HERNANDEZ           | Date of reception:   | 18/10/2016                  |
| Sample name:            | DAOTA-NO2           | Date of certificate: | 26/10/2016                  |
| Sample number:          | 8511                | Data filename:       | SMS10GE-161020-ES-A015      |
| Operator:               | Eliane Sandmeier    | Instrument:          | QSTAR Pulsar (AB/MDS Sciex) |
| Principal investigator: | Dr. Sophie Michalet | Ionisation mode:     | ESI (positive mode)         |

| Expected Formula                                              | Observed $m/z$ [M] <sup>+</sup> | Expected $m/z$ (amu) | Accuracy (ppm) |
|---------------------------------------------------------------|---------------------------------|----------------------|----------------|
| C <sub>25</sub> H <sub>22</sub> N <sub>3</sub> O <sub>2</sub> | 412.1661                        | 412.1656             | 1.2            |

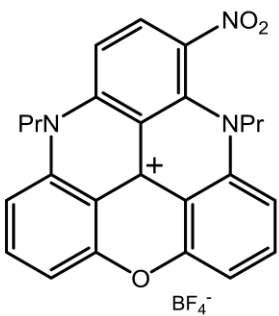

Chemical Formula:  
C<sub>25</sub>H<sub>22</sub>BF<sub>4</sub>N<sub>3</sub>O<sub>3</sub> IH-DAOTA-NO<sub>2</sub>  
Exact Mass: 499.17

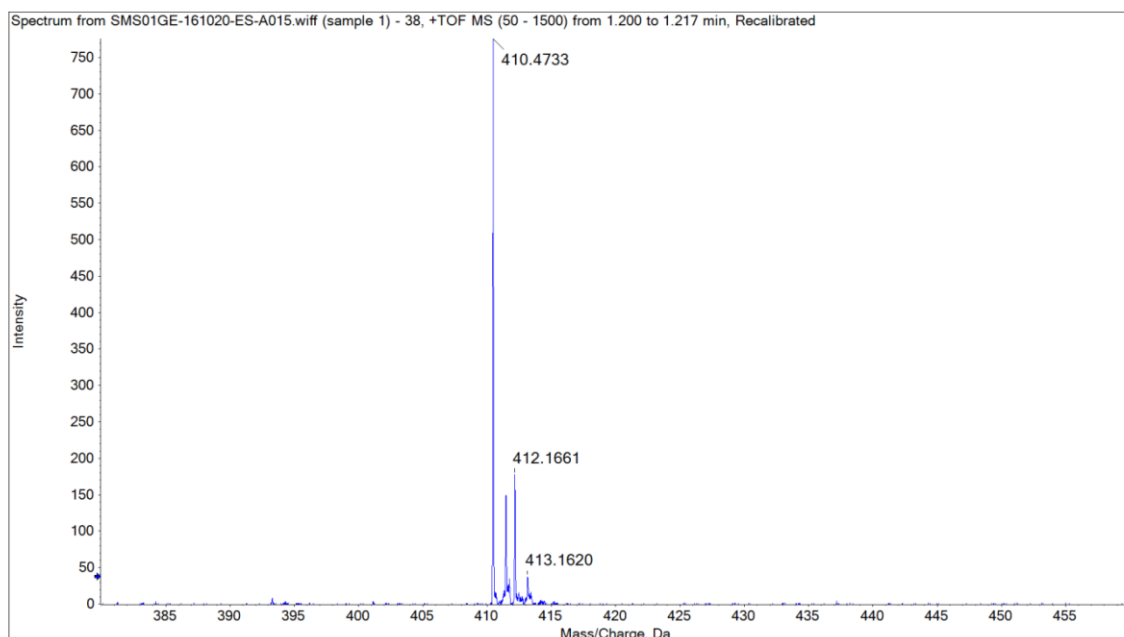

### Compound 3

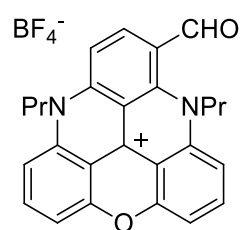

$^1\text{H}$  NMR (400 MHz,  $\text{CD}_3\text{CN}$ )

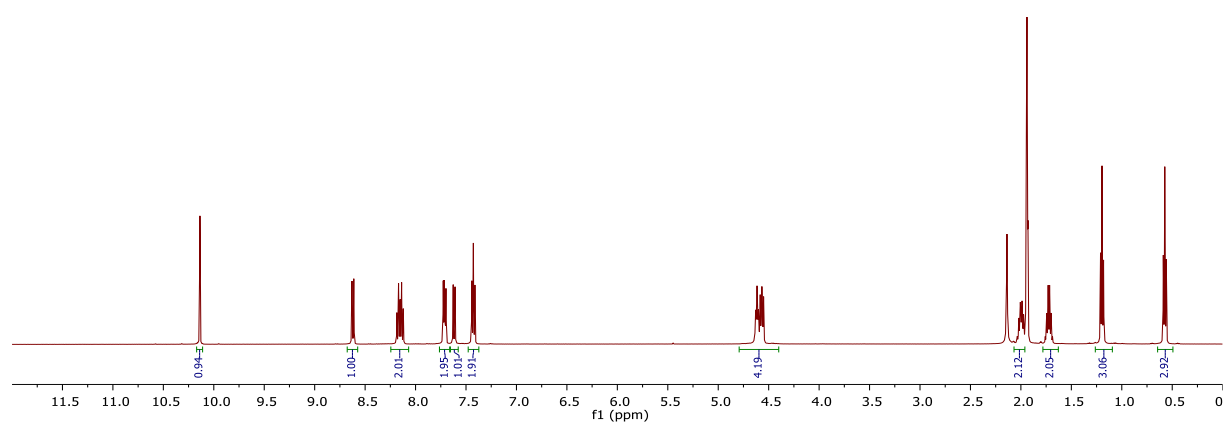

$^{13}\text{C}$  NMR (101 MHz,  $\text{CD}_3\text{CN}$ )

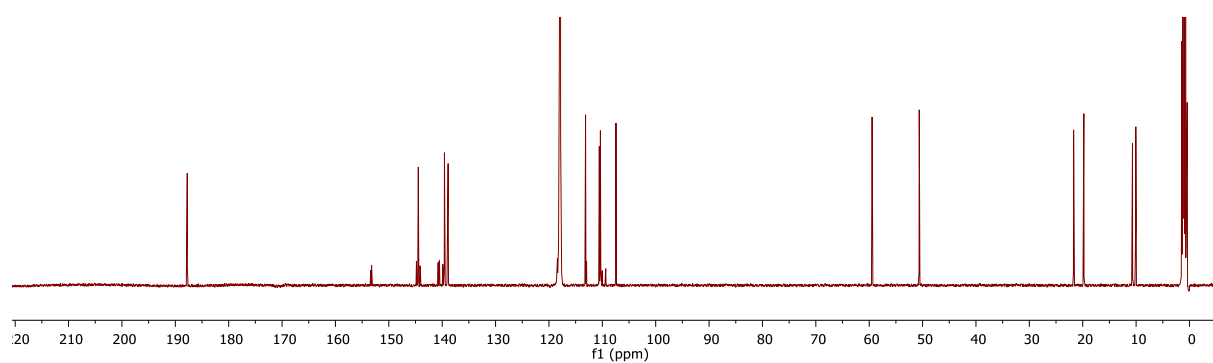

$^{19}\text{F}$  NMR (282 MHz,  $\text{CD}_3\text{CN}$ )

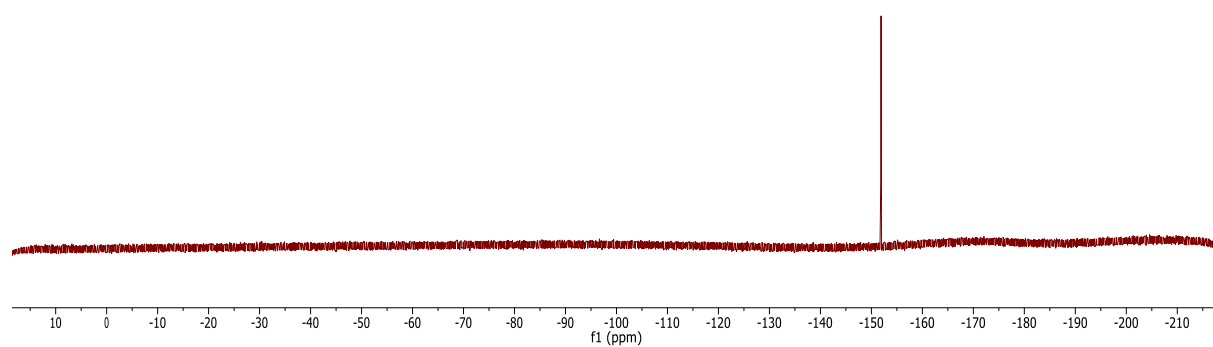

|                         |                     |                      |                             |
|-------------------------|---------------------|----------------------|-----------------------------|
| Submitter:              | HERNANDEZ           | Date of reception:   | 18/10/2016                  |
| Sample name:            | DAOTA-CHO           | Date of certificate: | 26/10/2016                  |
| Sample number:          | 8510                | Data filename:       | SMS10GE-161020-ES-A014      |
| Operator:               | Eliane Sandmeier    | Instrument:          | QSTAR Pulsar (AB/MDS Sciex) |
| Principal investigator: | Dr. Sophie Michalet | Ionisation mode:     | ESI (positive mode)         |

| Expected Formula                                              | Observed $m/z$ [ $M$ ] <sup>+</sup> | Expected $m/z$ (amu) | Accuracy (ppm) |
|---------------------------------------------------------------|-------------------------------------|----------------------|----------------|
| C <sub>26</sub> H <sub>23</sub> N <sub>2</sub> O <sub>2</sub> | 395.1753                            | 395.1754             | -0.3           |

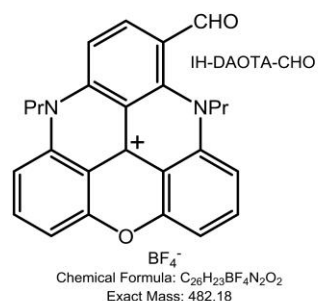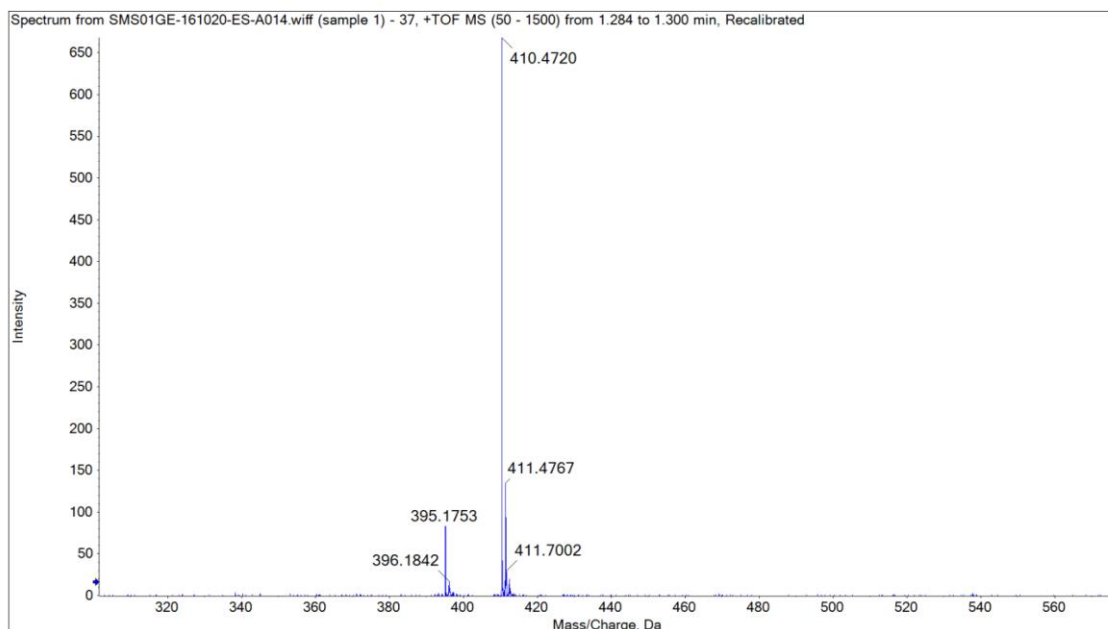

## Compound 4

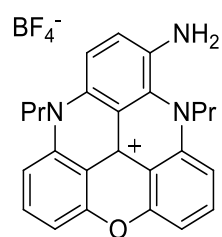

$^1\text{H}$  NMR (400 MHz,  $\text{CD}_3\text{CN}$ )

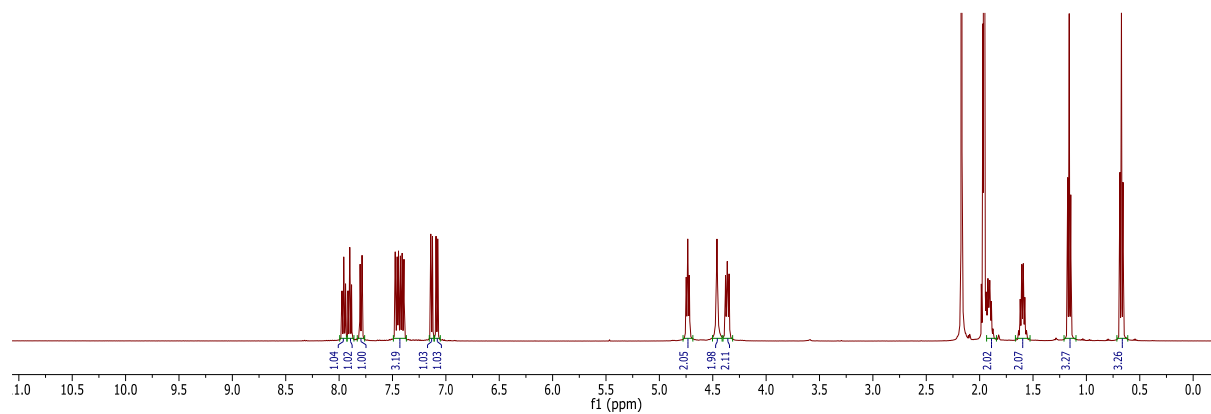

$^{13}\text{C}$  NMR (101 MHz,  $\text{CD}_3\text{CN}$ )

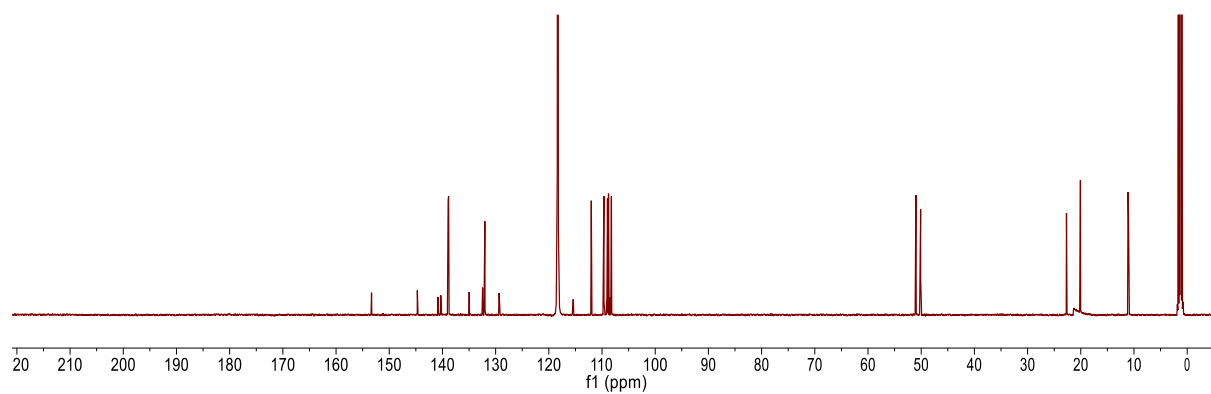

$^{19}\text{F}$  NMR (282 MHz,  $\text{CD}_3\text{CN}$ )

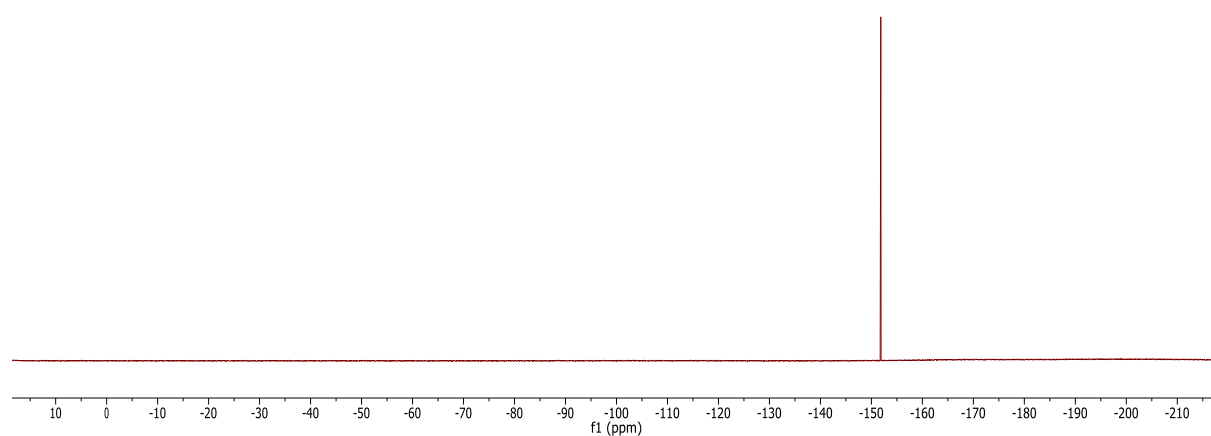

|                         |                     |                      |                             |
|-------------------------|---------------------|----------------------|-----------------------------|
| Submitter:              | HERNANDEZ           | Date of reception:   | 18/10/2016                  |
| Sample name:            | DAOTA-NH2           | Date of certificate: | 26/10/2016                  |
| Sample number:          | 8512                | Data filename:       | SMS10GE-161020-ES-A016      |
| Operator:               | Eliane Sandmeier    | Instrument:          | QSTAR Pulsar (AB/MDS Sciex) |
| Principal investigator: | Dr. Sophie Michalet | Ionisation mode:     | ESI (positive mode)         |

| Expected Formula                                 | Observed $m/z$ [M] <sup>+</sup> | Expected $m/z$ (amu) | Accuracy (ppm) |
|--------------------------------------------------|---------------------------------|----------------------|----------------|
| C <sub>25</sub> H <sub>24</sub> N <sub>3</sub> O | 382.1918                        | 382.1914             | 1.2            |

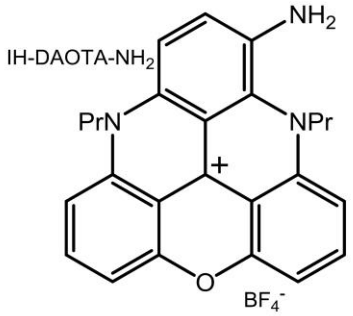

IH-DAOTA-NH<sub>2</sub>

PrN

NPr

BF<sub>4</sub><sup>-</sup>

Chemical Formula: C<sub>25</sub>H<sub>24</sub>BF<sub>4</sub>N<sub>3</sub>O  
Exact Mass: 469.19

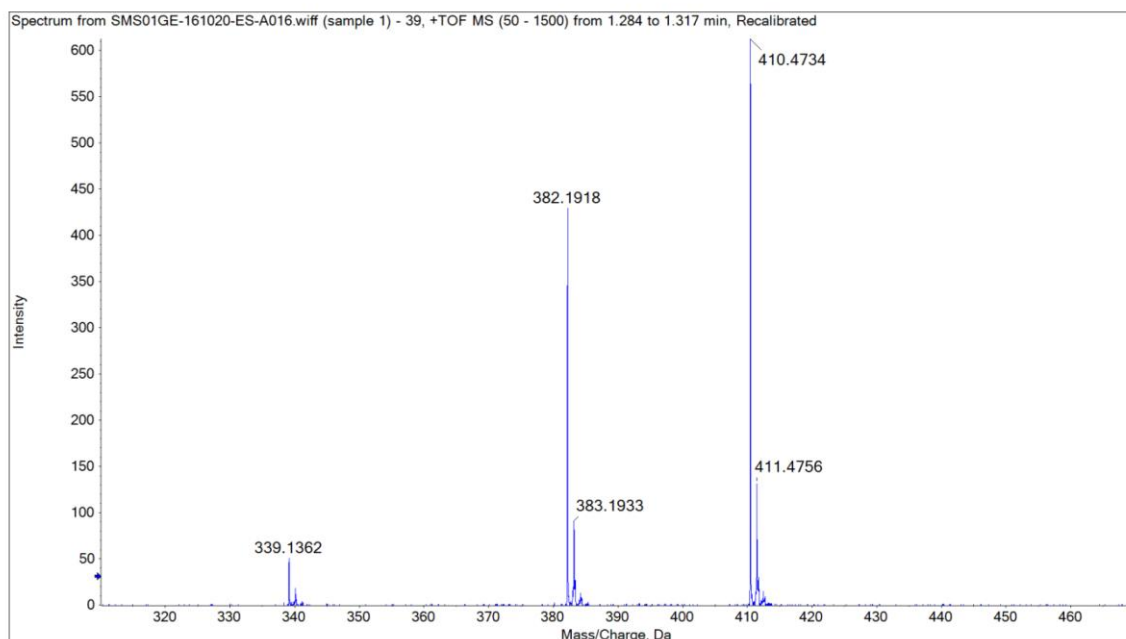

Compound 2

Compound 2



## Compound 5

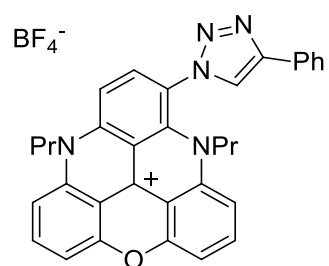

$^1\text{H}$  NMR (500 MHz,  $\text{CD}_3\text{CN}$ )

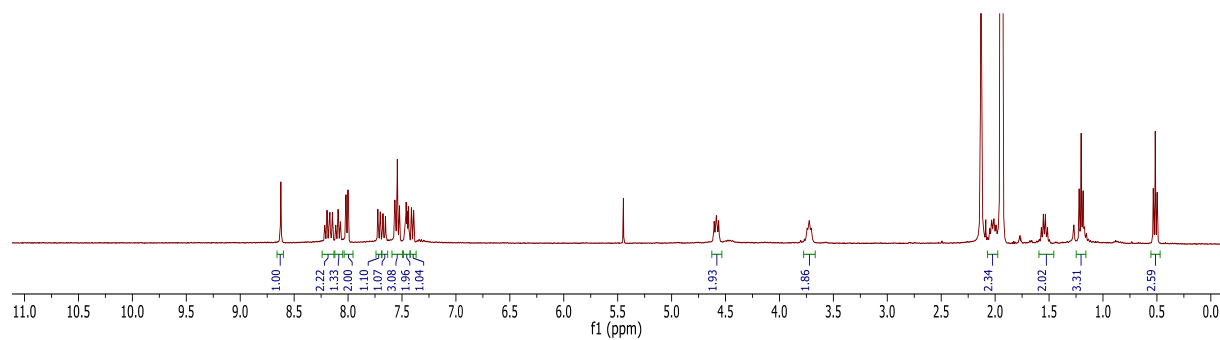

$^{13}\text{C}$  NMR (126 MHz,  $\text{CD}_3\text{CN}$ )

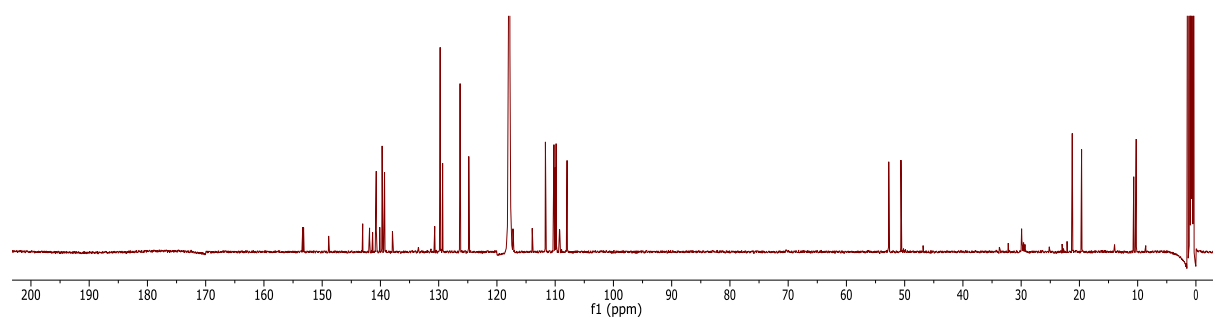

$^{19}\text{F}$  NMR (282 MHz,  $\text{CD}_3\text{CN}$ )

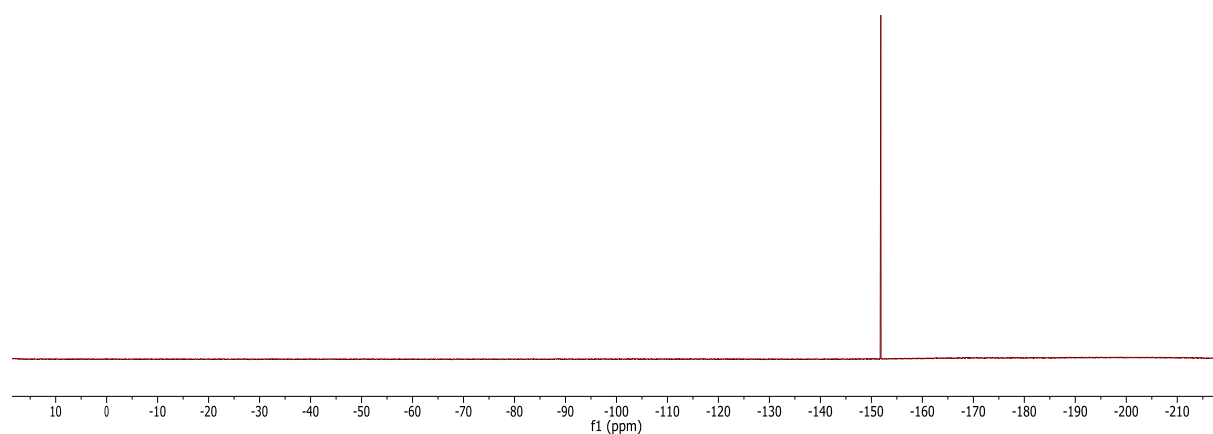

# UNIVERSITY OF GENEVA

Faculty of Sciences

Sciences Mass Spectrometry

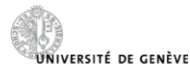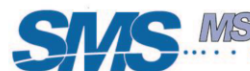

|                         |                     |                      |                             |
|-------------------------|---------------------|----------------------|-----------------------------|
| Submitter:              | HERNANDEZ           | Date of reception:   | 18/10/2016                  |
| Sample name:            | DAOTA-TRIAZOL       | Date of certificate: | 24/10/2016                  |
| Sample number:          | 8507                | Data filename:       | SMS10GE-161020-ES-A009      |
| Operator:               | Eliane Sandmeier    | Instrument:          | QSTAR Pulsar (AB/MDS Sciex) |
| Principal investigator: | Dr. Sophie Michalet | Ionisation mode:     | ESI (positive mode)         |

| Expected Formula                                 | Observed $m/z$ [ $M$ ] <sup>+</sup> | Expected $m/z$ (amu) | Accuracy (ppm) |
|--------------------------------------------------|-------------------------------------|----------------------|----------------|
| C <sub>33</sub> H <sub>28</sub> N <sub>5</sub> O | 510.2306                            | 510.2288             | 3.4            |

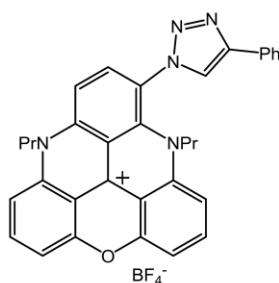

Chemical Formula: C<sub>33</sub>H<sub>28</sub>BF<sub>4</sub>N<sub>5</sub>O  
Exact Mass: 597.23

IH-DAOTA-Triazolo

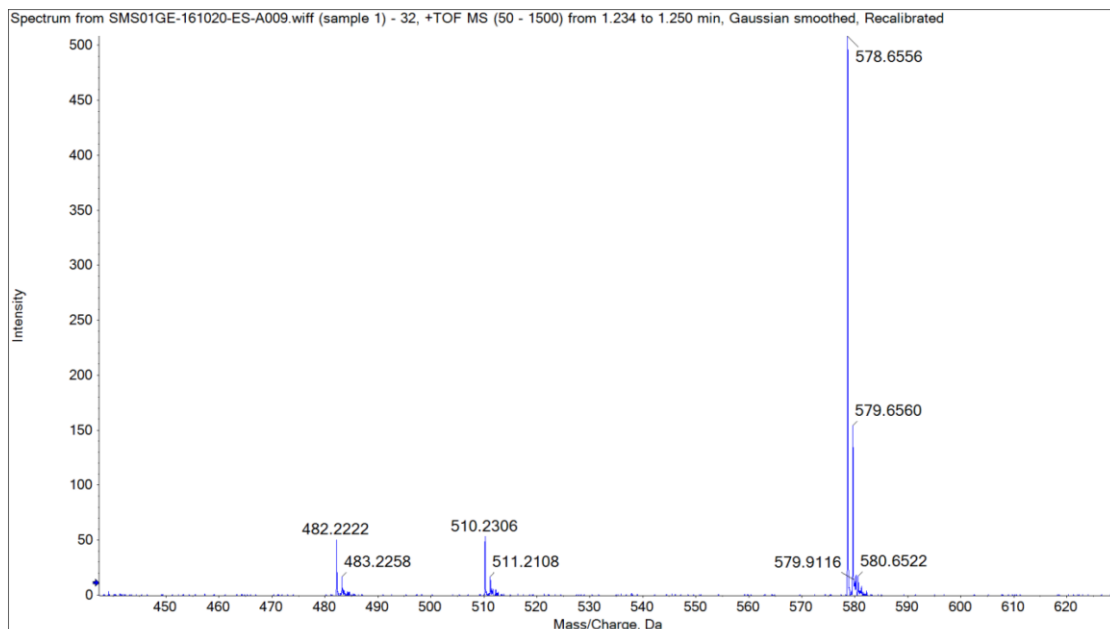

## Compound 6

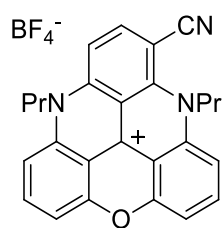

$^1\text{H}$  NMR (500 MHz,  $\text{CD}_3\text{CN}$ )

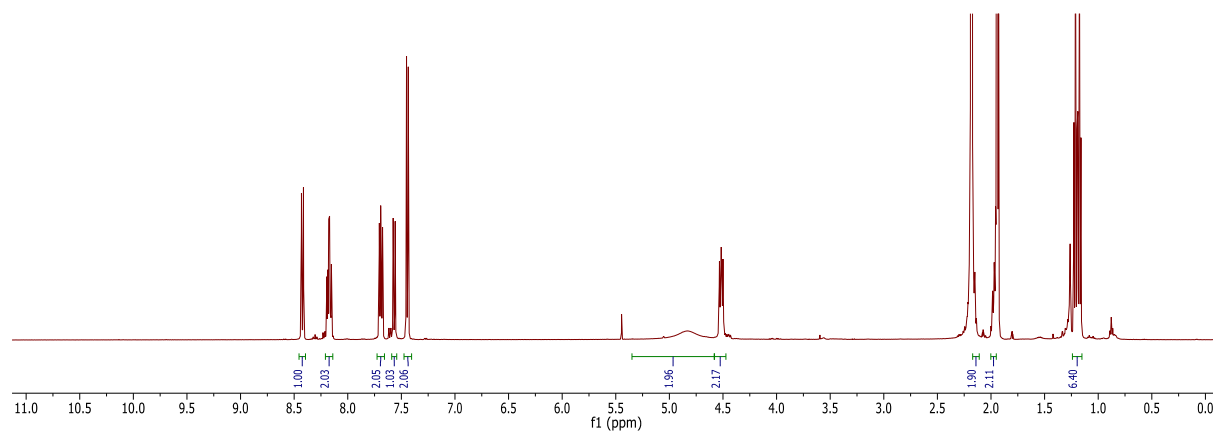

$^{13}\text{C}$  NMR (126 MHz,  $\text{CD}_3\text{CN}$ )

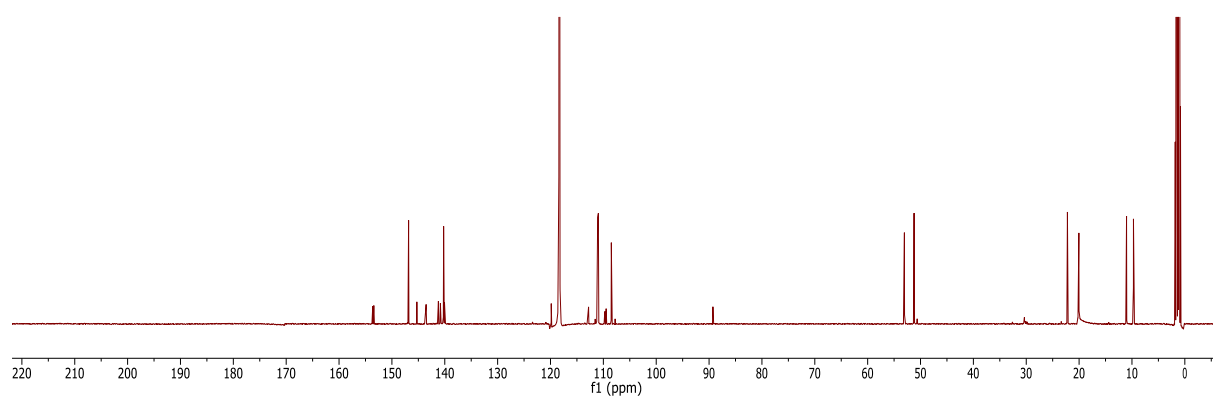

$^{19}\text{F}$  NMR (282 MHz,  $\text{CD}_3\text{CN}$ )

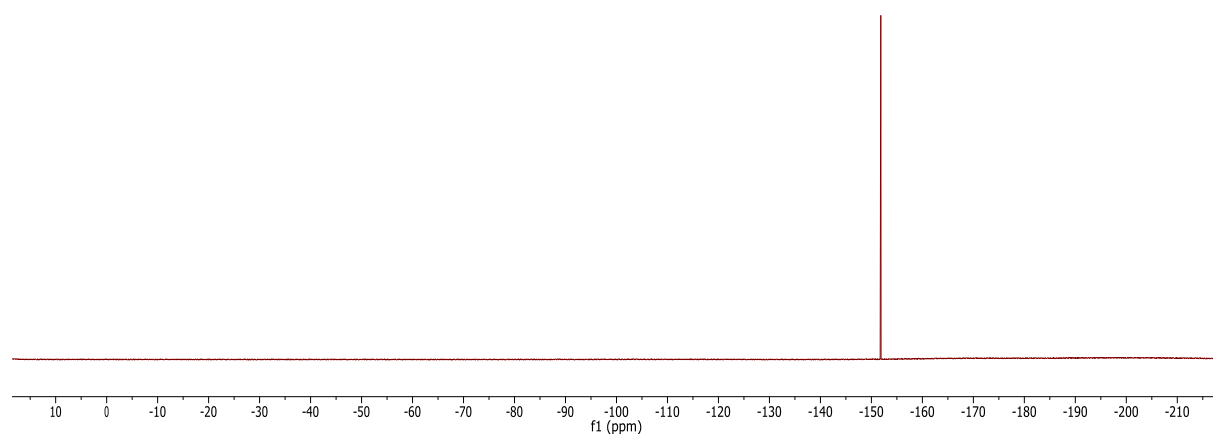

# UNIVERSITY OF GENEVA

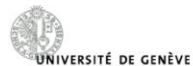

Faculty of Sciences

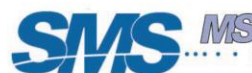

Sciences Mass Spectrometry

|                         |                     |                      |                             |
|-------------------------|---------------------|----------------------|-----------------------------|
| Submitter:              | HERNANDEZ           | Date of reception:   | 18/10/2016                  |
| Sample name:            | DAOTA-CN            | Date of certificate: | 26/10/2016                  |
| Sample number:          | 8513                | Data filename:       | SMS10GE-161020-ES-A019      |
| Operator:               | Eliane Sandmeier    | Instrument:          | QSTAR Pulsar (AB/MDS Sciex) |
| Principal investigator: | Dr. Sophie Michalet | Ionisation mode:     | ESI (positive mode)         |

| Expected Formula                                 | Observed $m/z$ [M] <sup>+</sup> | Expected $m/z$ (amu) | Accuracy (ppm) |
|--------------------------------------------------|---------------------------------|----------------------|----------------|
| C <sub>26</sub> H <sub>22</sub> N <sub>3</sub> O | 392.1759                        | 392.1757             | 0.5            |

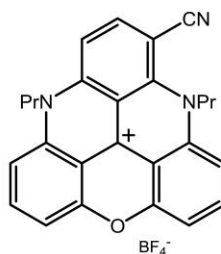

Chemical Formula:  
C<sub>26</sub>H<sub>22</sub>BF<sub>4</sub>N<sub>3</sub>O  
Exact Mass: 479.18  
IH-DAOTA-CN

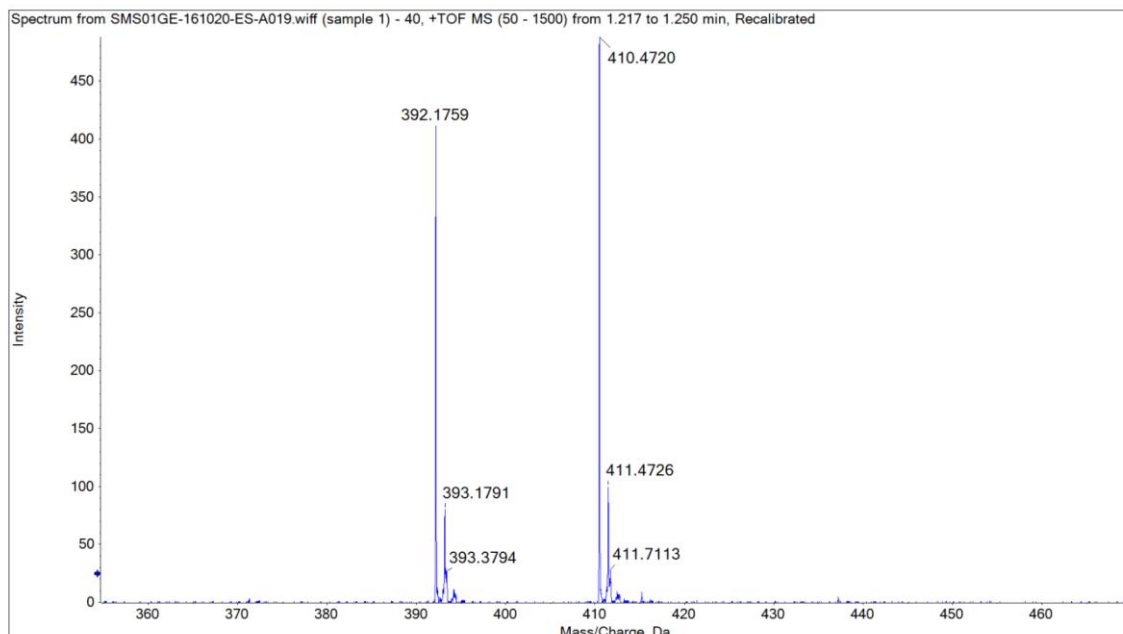

## Compound 7

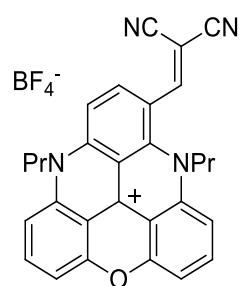

### <sup>1</sup>H NMR (500 MHz, CD<sub>3</sub>CN)

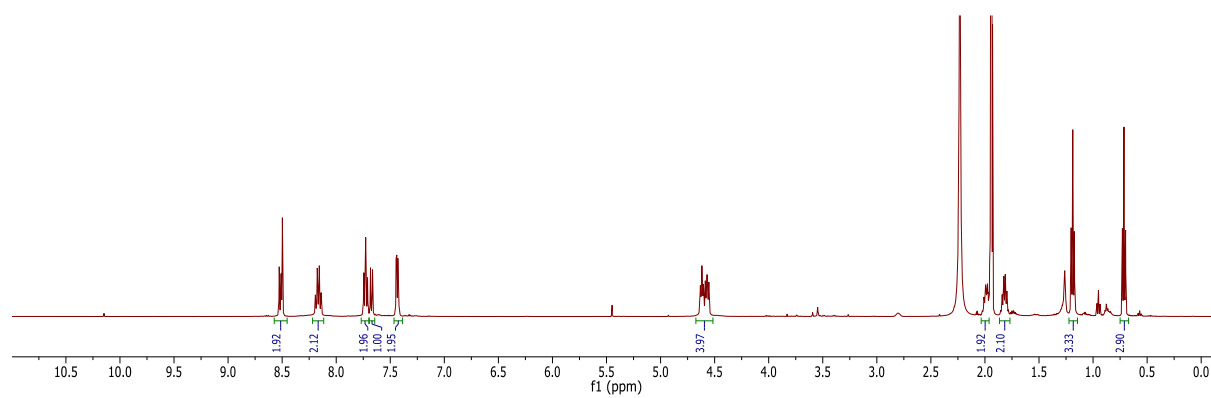

### <sup>13</sup>C NMR (126 MHz, CD<sub>3</sub>CN)

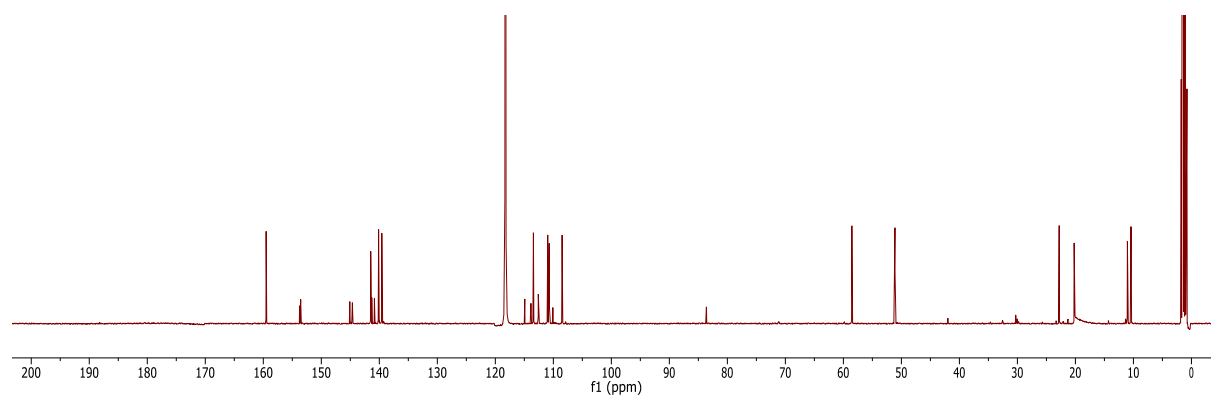

### <sup>19</sup>F NMR (282 MHz, CD<sub>3</sub>CN)

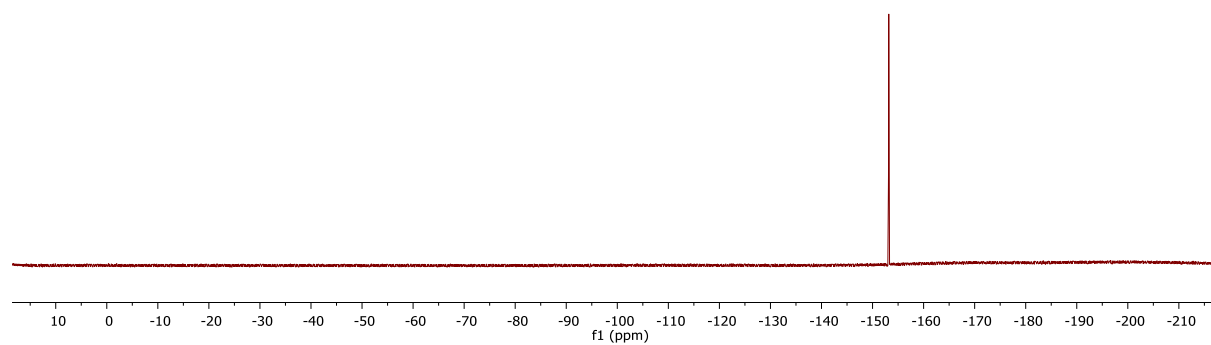

## ESI-HRMS – Certificate of Analysis

|                 |                          |                      |                                   |
|-----------------|--------------------------|----------------------|-----------------------------------|
| Applicant:      | Irene Hernandez          | Date of reception:   | September 25 <sup>th</sup> , 2017 |
| Group/Company:  | Prof. LACOUR             | Date of certificate: | September 27 <sup>th</sup> , 2017 |
| Sample name:    | IH-DAOTA-KNOEV           | Data filename:       | SMS-XL-170926-ES-A003             |
| Sample number:  | 8941                     | Instrument:          | QSTAR XL (AB/MDS Sciex)           |
| <b>Analyst:</b> | <b>Eliane SANDMEIER</b>  | Ionisation mode:     | ESI (positive polarity)           |
| <b>Contact:</b> | <b>esi-hrms@unige.ch</b> |                      |                                   |

| Expected Formula                                 | Ion type         | Theoretical m/z | Observed m/z | Accuracy (ppm) <sup>a)</sup> |
|--------------------------------------------------|------------------|-----------------|--------------|------------------------------|
| C <sub>29</sub> H <sub>23</sub> N <sub>4</sub> O | [M] <sup>+</sup> | 443.1866        | 443.1860     | -1.4                         |

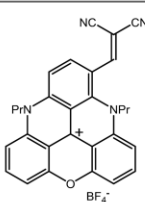

**IH-DAOTA-Knoev**  
Chemical Formula: C<sub>29</sub>H<sub>23</sub>N<sub>4</sub>O<sup>+</sup>  
Molecular Weight: 443.53  
m/z: 443.19 (100.0%), 444.19 (31.4%), 445.19 (4.7%), 444.18 (1.5%)

<sup>a)</sup> Mass accuracy is determined after spectrum re-calibration (internal calibration with standards added to the FIA mobile phase)

### Recalibrated mass spectrum

● Spectrum from SMS-XL-170926-ES-A003.wiff (sample 1) - 8941, +TOF MS (100 - 1500) from 1.451 to 1.484 min, Recalibrated  
● Isotopic Distribution for C<sub>29</sub>H<sub>23</sub>N<sub>4</sub>O<sup>+</sup>

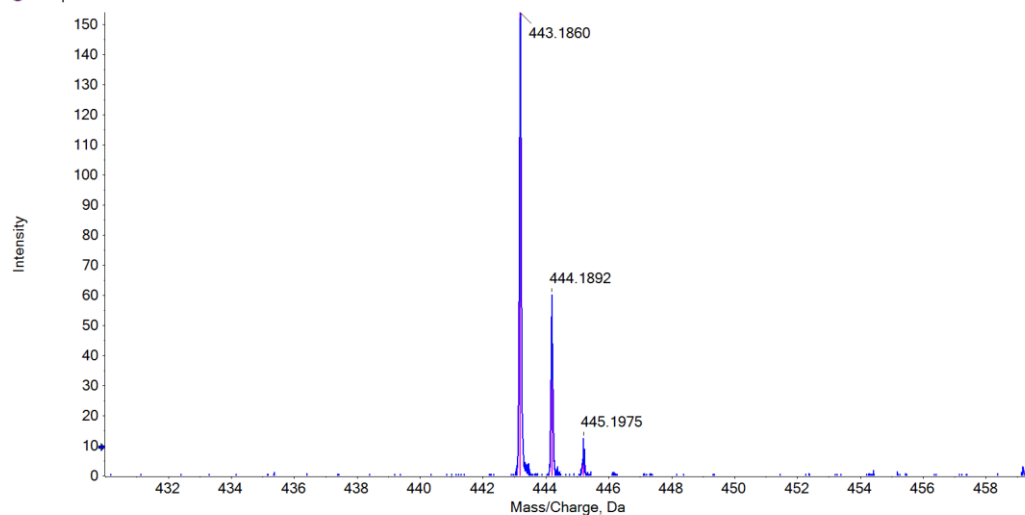

**Compound 4**

**Compound 4**

**Compound 7**

**Compound 7**

### Compound 8-H<sup>+</sup>

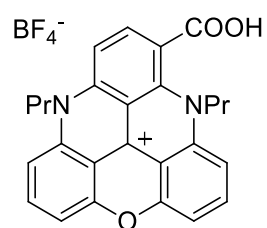

<sup>1</sup>H NMR (400 MHz, CD<sub>3</sub>CN)

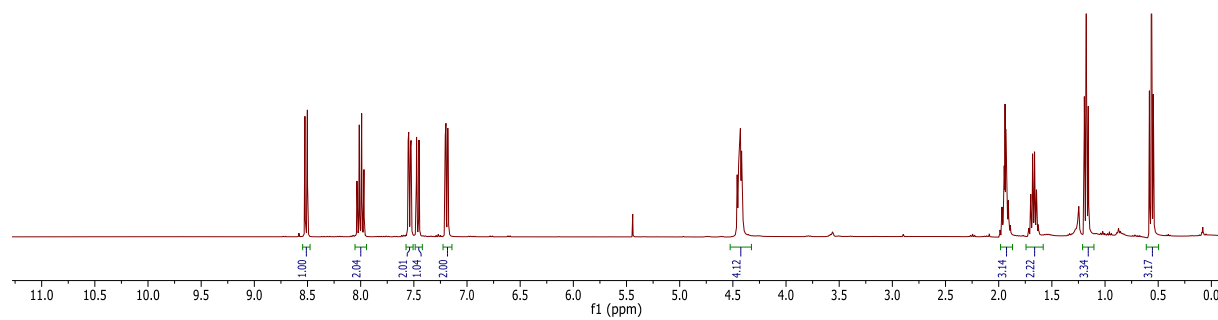

<sup>13</sup>C NMR (101 MHz, CD<sub>3</sub>CN)

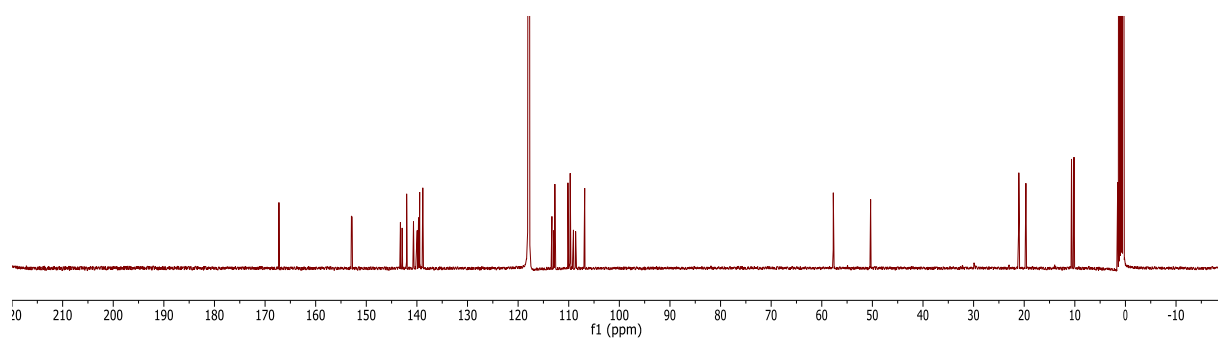

<sup>19</sup>F NMR (282 MHz, CD<sub>3</sub>CN)

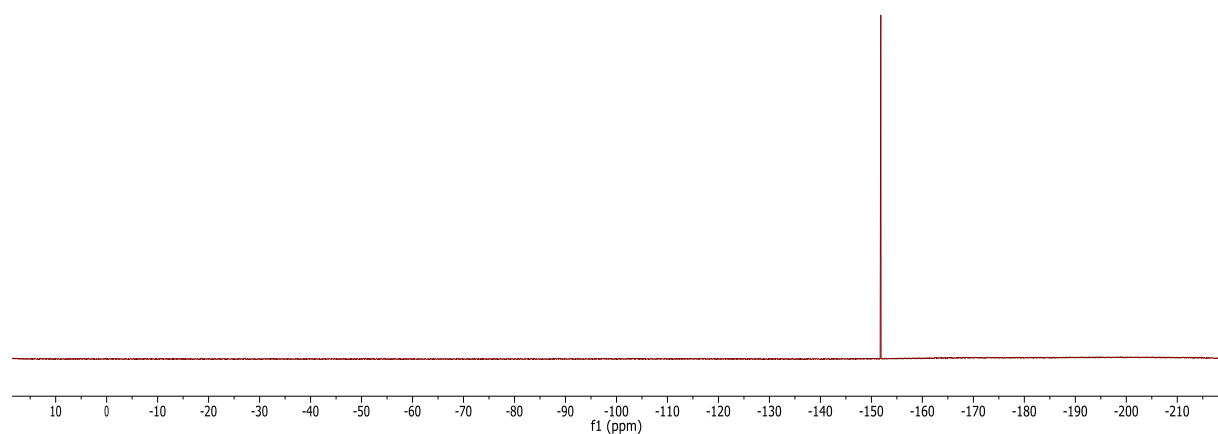

|                         |                     |                      |                             |
|-------------------------|---------------------|----------------------|-----------------------------|
| Submitter:              | HERNANDEZ           | Date of reception:   | 18/10/2016                  |
| Sample name:            | DAOTA-COOH          | Date of certificate: | 07/11/2016                  |
| Sample number:          | 8545                | Data filename:       | SMS10GE-161102-ES-A028      |
| Operator:               | Eliane Sandmeier    | Instrument:          | QSTAR Pulsar (AB/MDS Sciex) |
| Principal investigator: | Dr. Sophie Michalet | Ionisation mode:     | ESI (positive mode)         |

| Expected Formula                                 | Observed $m/z$ [M] <sup>+</sup> | Expected $m/z$ (amu) | Accuracy (ppm) |
|--------------------------------------------------|---------------------------------|----------------------|----------------|
| C <sub>26</sub> H <sub>23</sub> N <sub>2</sub> O | 411.1675                        | 411.1703             | -2.9           |

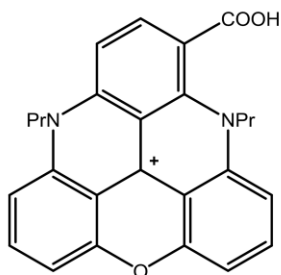

BF<sub>4</sub><sup>-</sup>

Chemical Formula: C<sub>26</sub>H<sub>23</sub>BF<sub>4</sub>N<sub>2</sub>O<sub>3</sub>  
Exact Mass: 498.17

Spectrum from SMS01GE-161102-ES-A028.wiff (sample 1) - 8552, +TOF MS (50 - 250...ample 1) - AGILENT, +TOF MS (50 - 2500) from 0.617 to 0.633 min), Recalibrated

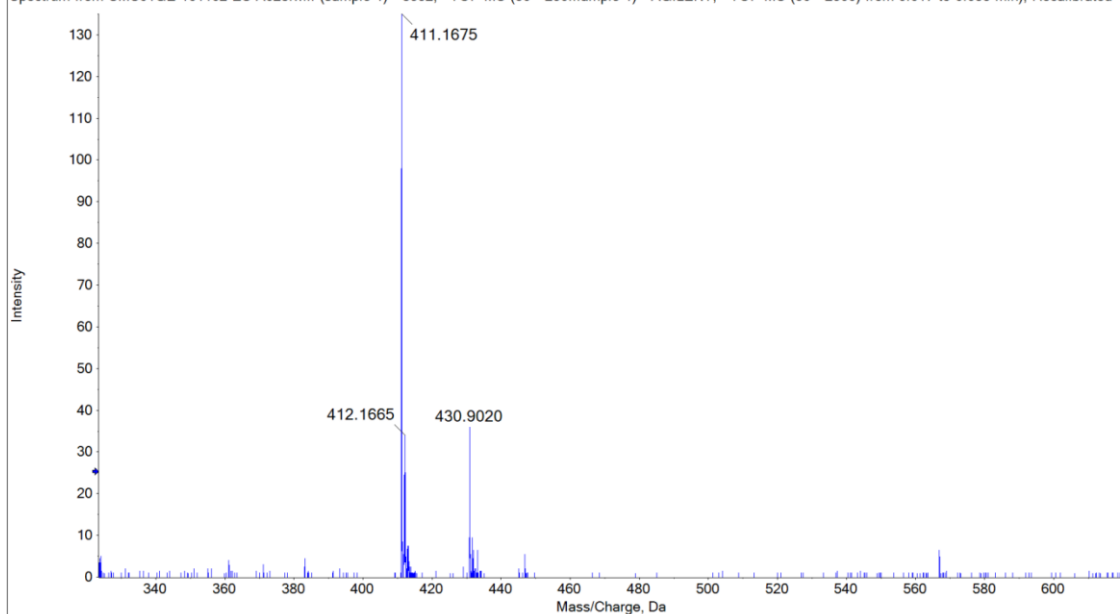



## Compound 9

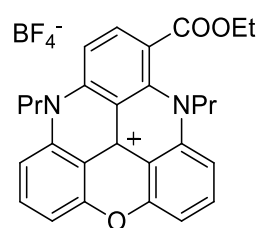

$^1\text{H}$  NMR (500 MHz,  $\text{CD}_3\text{CN}$ )

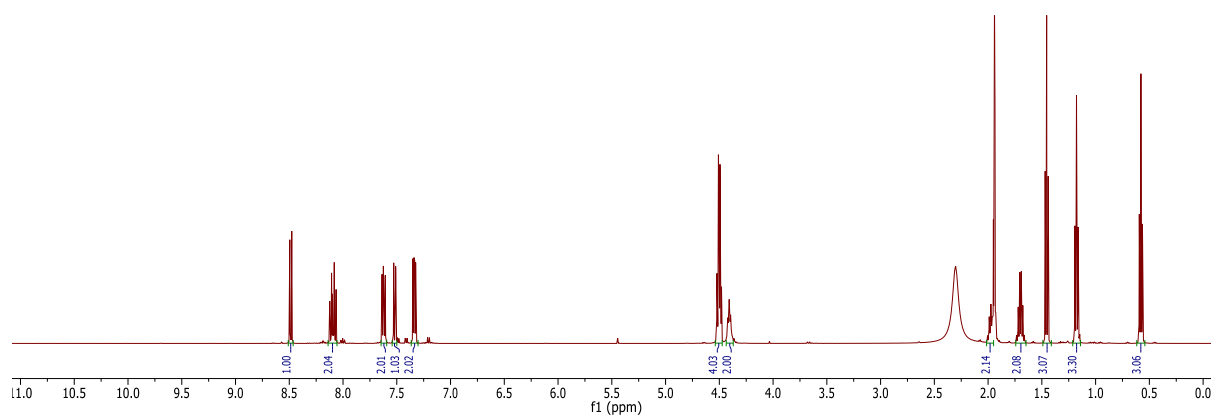

$^{13}\text{C}$  NMR (126 MHz,  $\text{CD}_3\text{CN}$ )

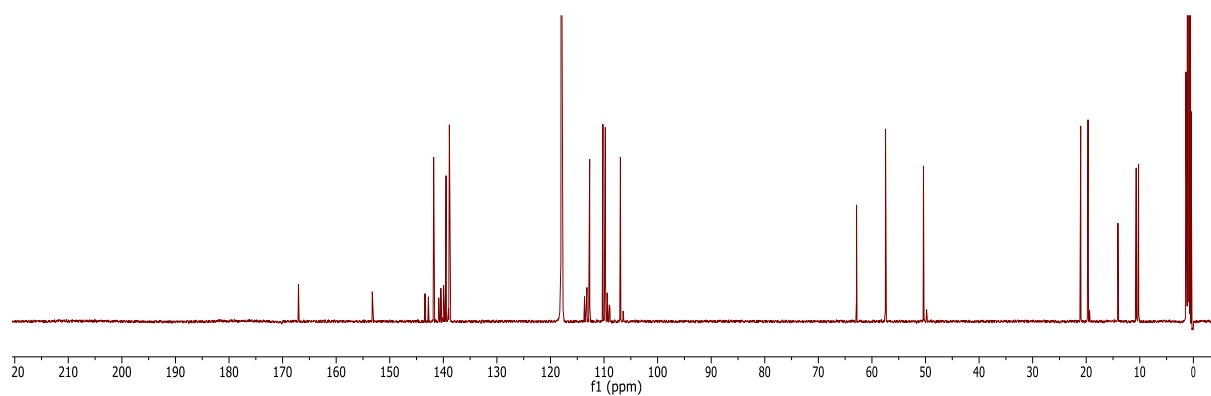

$^{19}\text{F}$  NMR (282 MHz,  $\text{CD}_3\text{CN}$ )

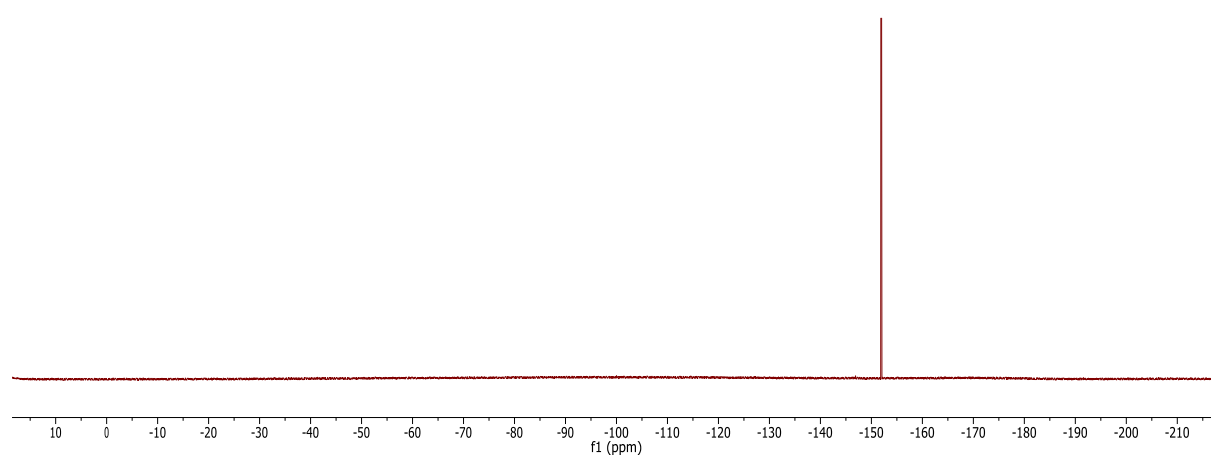

# Mass Spectrometry Core Facility

Faculty of Sciences – University of Geneva

## ESI-HRMS – Certificate of Analysis

|                |                   |                      |                                   |
|----------------|-------------------|----------------------|-----------------------------------|
| Applicant:     | Irene Hernandez   | Date of reception:   | September 25 <sup>th</sup> , 2017 |
| Group/Company: | Prof. LACOUR      | Date of certificate: | September 27 <sup>th</sup> , 2017 |
| Sample name:   | IH-DAOTA-CO2Et    | Data filename:       | SMS-XL-170926-ES-A012             |
| Sample number: | 8950              | Instrument:          | QSTAR XL (AB/MDS Sciex)           |
| Analyst:       | Eliane SANDMEIER  | Ionisation mode:     | ESI (positive polarity)           |
| Contact:       | esi-hrms@unige.ch |                      |                                   |

| Expected Formula                                              | Ion type         | Theoretical $m/z$ | Observed $m/z$ | Accuracy (ppm) <sup>a)</sup> |
|---------------------------------------------------------------|------------------|-------------------|----------------|------------------------------|
| C <sub>24</sub> H <sub>27</sub> N <sub>2</sub> O <sub>3</sub> | [M] <sup>+</sup> | 439.2016          | 439.2012       | 1.0                          |

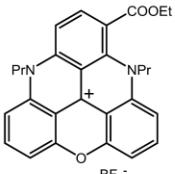

IH-DAOTA-COOEt  
Chemical Formula: C<sub>28</sub>H<sub>27</sub>BF<sub>4</sub>N<sub>2</sub>O<sub>3</sub><sup>+</sup>  
Molecular Weight: 526.34  
m/z: 439.20 (100.0%), 440.20 (30.3%), 441.21 (2.7%), 441.21 (1.7%)

<sup>a)</sup> Mass accuracy is determined after spectrum re-calibration (internal calibration with standards added to the FIA mobile phase)

### Recalibrated mass spectrum

● Spectrum from SMS-XL-170926-ES-A012.wiff (sample 1) - 8950, +TOF MS (100 - 1500) from 1.434 to 1.468 min, Recalibrated  
● Isotopic Distribution for C<sub>28</sub>H<sub>27</sub>N<sub>2</sub>O<sub>3</sub><sup>+</sup>

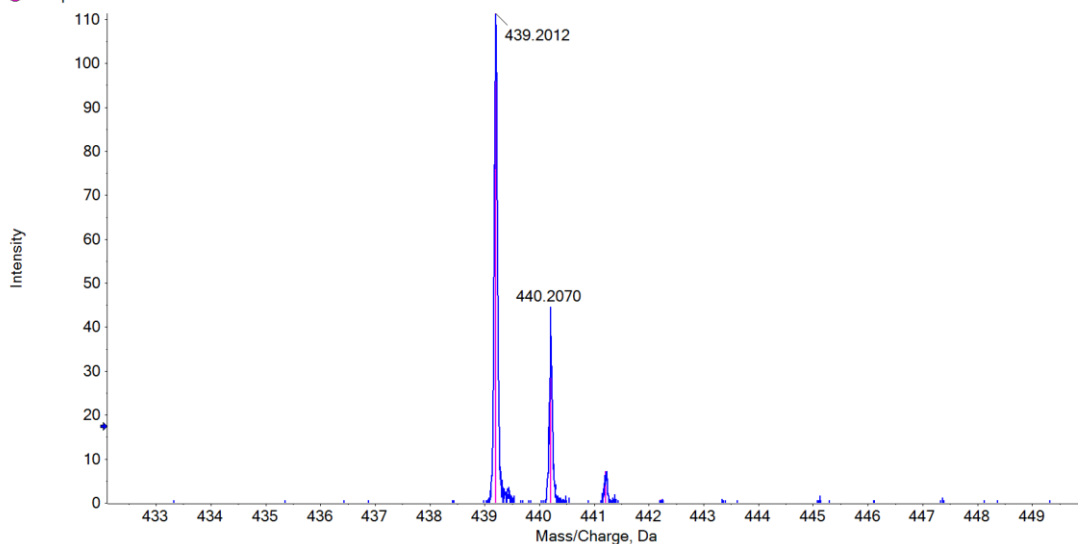

Compound 7

Compound 7

## Compound 10

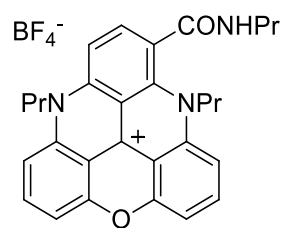

$^1\text{H}$  NMR (500 MHz,  $\text{CD}_3\text{CN}$ )

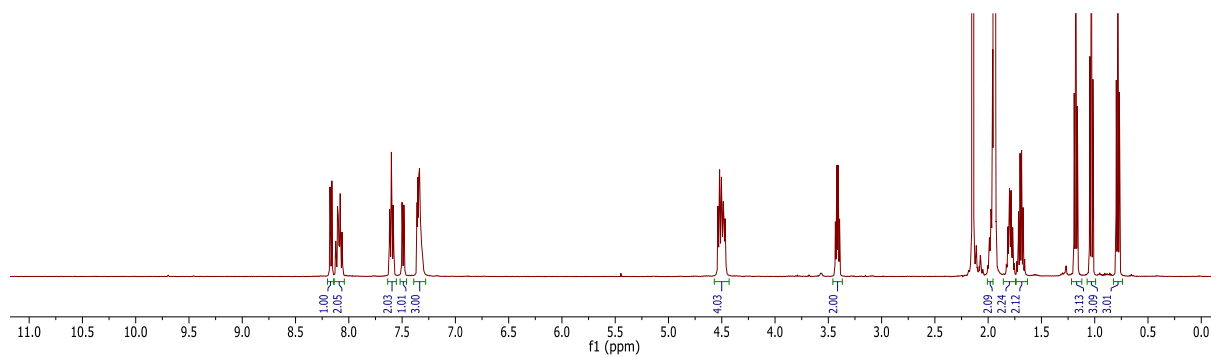

$^{13}\text{C}$  NMR (126 MHz,  $\text{CD}_3\text{CN}$ )

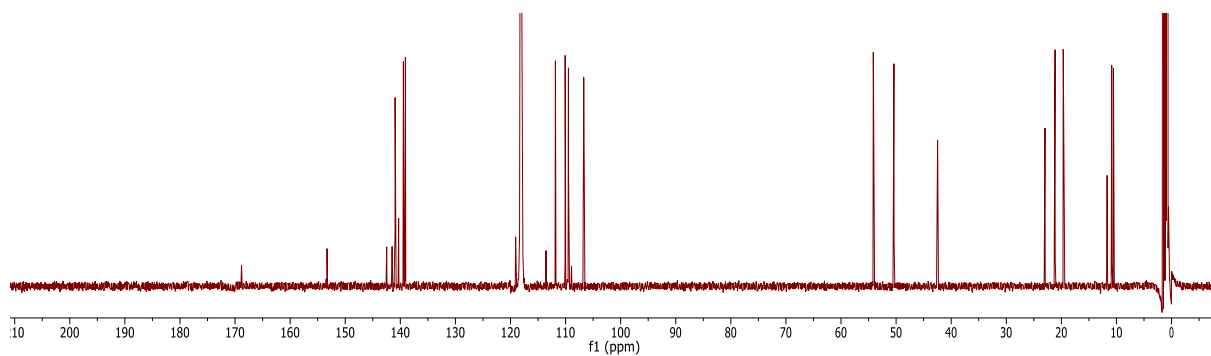

$^{19}\text{F}$  NMR (282 MHz,  $\text{CD}_3\text{CN}$ )

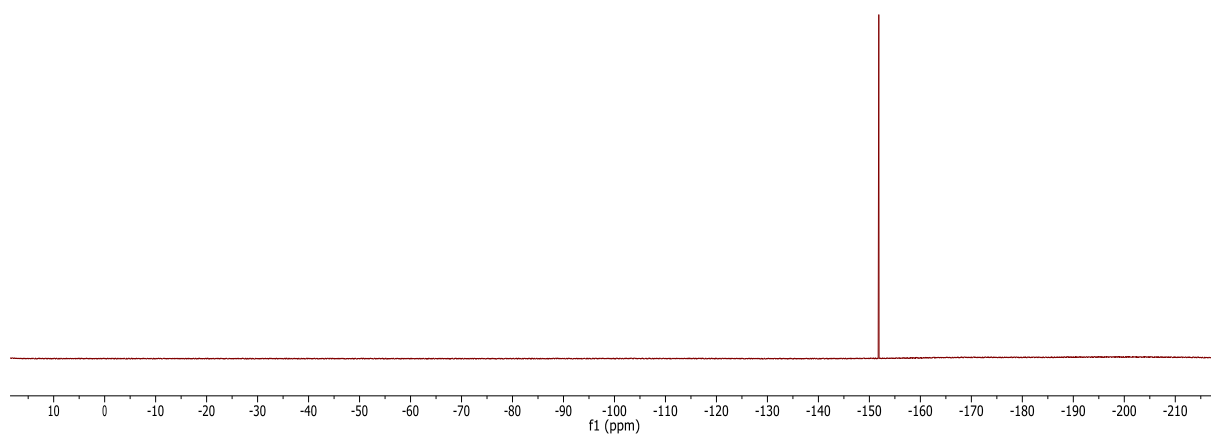

# UNIVERSITY OF GENEVA

Faculty of Sciences

Sciences Mass Spectrometry

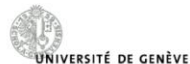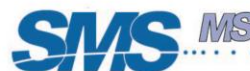

|                         |                     |                      |                             |
|-------------------------|---------------------|----------------------|-----------------------------|
| Submitter:              | HERNANDEZ           | Date of reception:   | 18/10/2016                  |
| Sample name:            | DAOTA-AMIDE         | Date of certificate: | 26/10/2016                  |
| Sample number:          | 8509                | Data filename:       | SMS10GE-161020-ES-A011      |
| Operator:               | Eliane Sandmeier    | Instrument:          | QSTAR Pulsar (AB/MDS Sciex) |
| Principal investigator: | Dr. Sophie Michalet | Ionisation mode:     | ESI (positive mode)         |

| Expected Formula                                              | Observed $m/z$ [M] <sup>+</sup> | Expected $m/z$ (amu) | Accuracy (ppm) |
|---------------------------------------------------------------|---------------------------------|----------------------|----------------|
| C <sub>29</sub> H <sub>30</sub> N <sub>3</sub> O <sub>2</sub> | 452.2340                        | 452.2333             | 1.7            |

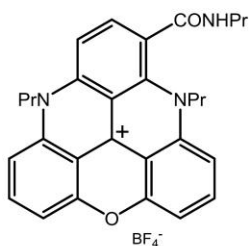

Chemical Formula:  
C<sub>29</sub>H<sub>30</sub>BF<sub>4</sub>N<sub>3</sub>O<sub>2</sub>  
Exact Mass: 539.24  
IH-DAOTA-CONHPr

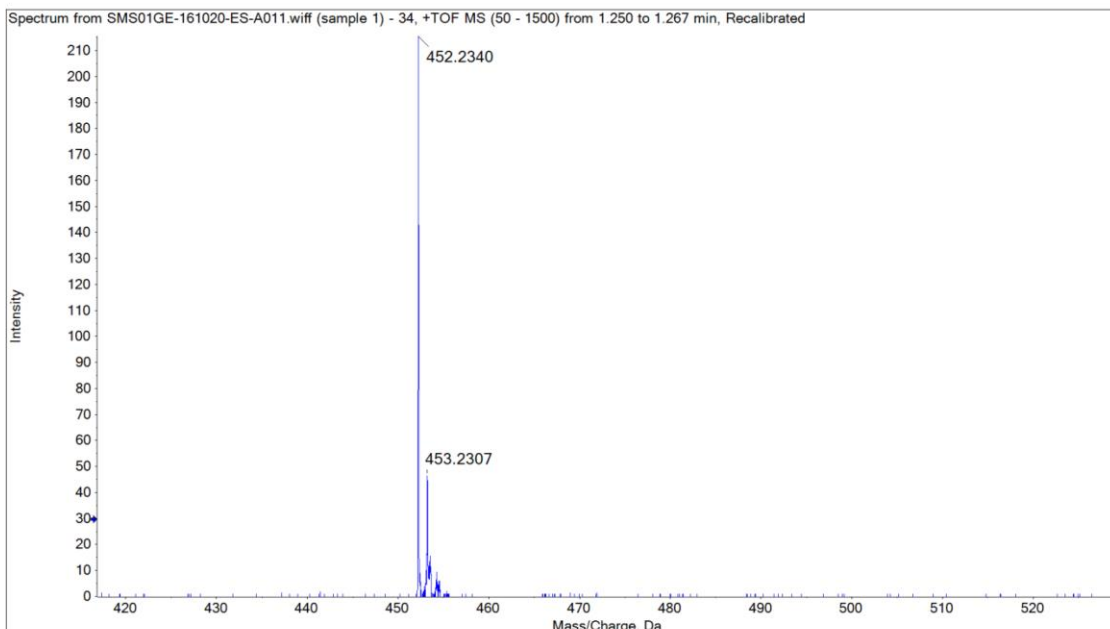

## II. X-ray diffraction

Details for the refinement for each structure can be found below. Tables of hydrogen bonds are also presented for each structure.

### Compound 1

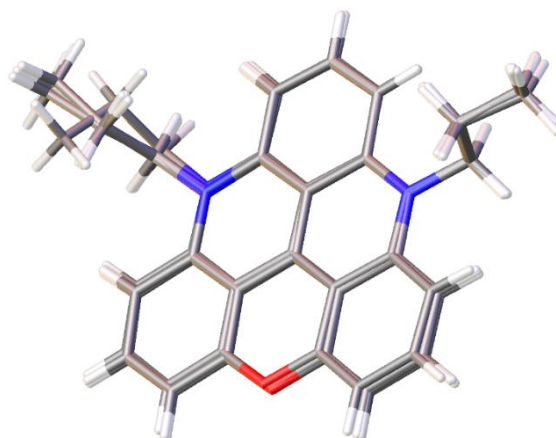

**Figure S1.** X-ray structure of DAOTA 1 (superimposition of the four symmetrically independent cationic triangle)

**Table S2.** Crystal data and structure refinement for 1

|                                          |                                                                                                             |
|------------------------------------------|-------------------------------------------------------------------------------------------------------------|
| <b>Identification code</b>               | ih_daota                                                                                                    |
| <b>Empirical formula</b>                 | C <sub>51</sub> H <sub>48</sub> B <sub>2</sub> Cl <sub>2</sub> F <sub>8</sub> N <sub>4</sub> O <sub>2</sub> |
| <b>Formula weight</b>                    | 993.45                                                                                                      |
| <b>Temperature/K</b>                     | 180.00(10)                                                                                                  |
| <b>Crystal system</b>                    | monoclinic                                                                                                  |
| <b>Space group</b>                       | P2 <sub>1</sub> /n                                                                                          |
| <b>a/Å</b>                               | 15.5373(3)                                                                                                  |
| <b>b/Å</b>                               | 25.9899(4)                                                                                                  |
| <b>c/Å</b>                               | 22.5918(4)                                                                                                  |
| <b>α/°</b>                               | 90                                                                                                          |
| <b>β/°</b>                               | 102.1432(17)                                                                                                |
| <b>γ/°</b>                               | 90                                                                                                          |
| <b>Volume/Å<sup>3</sup></b>              | 8918.7(3)                                                                                                   |
| <b>Z</b>                                 | 8                                                                                                           |
| <b>ρ<sub>calc</sub>/g/cm<sup>3</sup></b> | 1.480                                                                                                       |
| <b>μ/mm<sup>-1</sup></b>                 | 2.015                                                                                                       |
| <b>F(000)</b>                            | 4112.0                                                                                                      |
| <b>Crystal size/mm<sup>3</sup></b>       | 0.181 × 0.05 × 0.037                                                                                        |
| <b>Radiation</b>                         | CuKα (λ = 1.54184)                                                                                          |
| <b>2θ range for data collection/°</b>    | 6.33 to 147.682                                                                                             |

|                                                   |                                                                |
|---------------------------------------------------|----------------------------------------------------------------|
| <b>Index ranges</b>                               | -17 ≤ h ≤ 19, -21 ≤ k ≤ 31, -27 ≤ l ≤ 26                       |
| <b>Reflections collected</b>                      | 35452                                                          |
| <b>Independent reflections</b>                    | 17572 [R <sub>int</sub> = 0.0218, R <sub>sigma</sub> = 0.0331] |
| <b>Data/restraints/parameters</b>                 | 17572/301/1362                                                 |
| <b>Goodness-of-fit on F<sup>2</sup></b>           | 1.025                                                          |
| <b>Final R indexes [I ≥ 2σ(I)]</b>                | R <sub>1</sub> = 0.0785, wR <sub>2</sub> = 0.2273              |
| <b>Final R indexes [all data]</b>                 | R <sub>1</sub> = 0.1033, wR <sub>2</sub> = 0.2612              |
| <b>Largest diff. peak/hole / e Å<sup>-3</sup></b> | 0.64/-1.23                                                     |

**Table S3.** Hydrogen bonds in **1**.

| donor | H    | acceptor | Symmetry code for the acceptor | D...A (Å) | D-H...A angle (°) |
|-------|------|----------|--------------------------------|-----------|-------------------|
| C1S   | H1SA | O1C      | 2555                           | 3.508(6)  | 153               |
| C1S   | H1SB | F3E      | 4564                           | 3.316(7)  | 145               |
| C3C   | H3C  | F3E      | 3566                           | 3.237(5)  | 146               |
| C4C   | H4C  | F1E      | 3566                           | 3.312(9)  | 145               |
| C4D   | H4D  | F1D      | 2545                           | 3.245(16) | 145               |
| C5    | H5   | F1C      | 4464                           | 3.327(7)  | 140               |
| C5C   | H5C  | F2F      | 1555                           | 3.27(4)   | 145               |
| C5D   | H5D  | F2C      | 4564                           | 3.346(11) | 154               |
| C8    | H8B  | F4D      | 2445                           | 3.47(2)   | 163               |
| C8B   | H8BB | F2E      | 3566                           | 3.402(6)  | 153               |
| C8B   | H8BB | F3F      | 3566                           | 3.44(3)   | 168'              |
| C10B  | H10G | F7AA     | 3566                           | 3.354(5)  | 139               |
| C12C  | H12C | F4C      | 1555                           | 3.314(13) | 153               |
| C12D  | H12D | F4F      | 4564                           | 3.25(3)   | 144               |
| C13   | H13  | F4AA     | 3566                           | 3.265(3)  | 135               |
| C8D   | H8DA | F2C      | 4564                           | 3.492(12) | 167               |
| C13B  | H13B | F2B      | 3565                           | 3.400(8)  | 151               |
| C13C  | H13C | F3C      | 1555                           | 3.288(10) | 141               |
| C13D  | H13D | F3F      | 4564                           | 3.33(2)   | 148               |
| C14   | H14  | F6AA     | 3566                           | 3.357(4)  | 165               |
| C18C  | H18A | F4AA     | 4464                           | 3.416(3)  | 169               |
| C18   | H18D | F6AA     | 1455                           | 3.246(4)  | 155               |
| C18D  | H18G | F3A      | 4565                           | 3.440(6)  | 156               |
| C19B  | H19F | F1C      | 4464                           | 3.177(7)  | 124               |
| C20   | H20E | F1F      | 1555                           | 2.85(4)   | 103               |
| C22B  | H22B | F3B      | 1555                           | 3.406(14) | 156               |
| C23B  | H23B | F3AA     | 4464                           | 3.357(4)  | 149               |

$$4464 = -1/2+x, 3/2-y, -1/2+z$$

$$2445 = -1/2-x, -1/2+y, 1/2-z$$

$$3566 = -x, 1-y, 1-z$$

$$1455 = -1+x, y, z$$

$$3565 = -x, 1-y, -z$$

$$2545 = 1/2-x, -1/2+y, 1/2-z$$

$$4565 = 1/2+x, 3/2-y, 1/2+z$$

$$2555 = 1/2-x, 1/2+y, 1/2-z$$

Compound 2

Table S3. Crystal data and structure refinement for 2.

|                                                   |                                                                               |
|---------------------------------------------------|-------------------------------------------------------------------------------|
| <b>Identification code</b>                        | <b>ih363b</b>                                                                 |
| <b>Empirical formula</b>                          | C <sub>25</sub> H <sub>22</sub> BF <sub>4</sub> N <sub>3</sub> O <sub>3</sub> |
| <b>Formula weight</b>                             | 499.26                                                                        |
| <b>Temperature/K</b>                              | 179.95(10)                                                                    |
| <b>Crystal system</b>                             | monoclinic                                                                    |
| <b>Space group</b>                                | P2 <sub>1</sub> /c                                                            |
| <b>a/Å</b>                                        | 9.65357(14)                                                                   |
| <b>b/Å</b>                                        | 12.04731(17)                                                                  |
| <b>c/Å</b>                                        | 18.5986(3)                                                                    |
| <b>α/°</b>                                        | 90                                                                            |
| <b>β/°</b>                                        | 94.0845(14)                                                                   |
| <b>γ/°</b>                                        | 90                                                                            |
| <b>Volume/Å<sup>3</sup></b>                       | 2157.52(5)                                                                    |
| <b>Z</b>                                          | 4                                                                             |
| <b>ρ<sub>calc</sub>/g/cm<sup>3</sup></b>          | 1.537                                                                         |
| <b>μ/mm<sup>-1</sup></b>                          | 1.062                                                                         |
| <b>F(000)</b>                                     | 1032.0                                                                        |
| <b>Crystal size/mm<sup>3</sup></b>                | 0.238 × 0.1457 × 0.1311                                                       |
| <b>Radiation</b>                                  | CuKα (λ = 1.54184)                                                            |
| <b>2θ range for data collection/°</b>             | 8.752 to 146.75                                                               |
| <b>Index ranges</b>                               | -7 ≤ h ≤ 11, -14 ≤ k ≤ 14, -21 ≤ l ≤ 23                                       |
| <b>Reflections collected</b>                      | 14409                                                                         |
| <b>Independent reflections</b>                    | 4274 [R <sub>int</sub> = 0.0177, R <sub>sigma</sub> = 0.0191]                 |
| <b>Data/restraints/parameters</b>                 | 4274/193/439                                                                  |
| <b>Goodness-of-fit on F<sup>2</sup></b>           | 1.051                                                                         |
| <b>Final R indexes [I ≥ 2σ (I)]</b>               | R <sub>1</sub> = 0.0451, wR <sub>2</sub> = 0.1184                             |
| <b>Final R indexes [all data]</b>                 | R <sub>1</sub> = 0.0491, wR <sub>2</sub> = 0.1228                             |
| <b>Largest diff. peak/hole / e Å<sup>-3</sup></b> | 0.46/-0.41                                                                    |



**Table S4.** Hydrogen bonds in **2**.

| donor  | H      | acceptor | Symmetry code for the acceptor | D...A (Å) | D-H...A angle (°) |
|--------|--------|----------|--------------------------------|-----------|-------------------|
| C(5A)  | H(5A)  | F(5B)    | 1655                           | 2.936(7)  | 128               |
| C(16)  | H(16A) | O(27)    |                                | 2.800(2)  | 122               |
| C(17)  | H(17A) | N(25)    |                                | 3.110(2)  | 127               |
| C(17)  | H(17B) | F(3)     | 1555                           | 3.264(2)  | 140               |
| C(17)  | H(17C) | F(3)     | 1555                           | 3.264(2)  | 140               |
| C(17)  | H(17D) | N(25)    |                                | 3.110(2)  | 125               |
| C(18A) | H(18C) | F(5A)    | 2646                           | 3.039(10) | 117               |
| C(18A) | H(18F) | F(5A)    | 2646                           | 3.039(10) | 156               |
| C(22A) | H(22A) | F(1)     | 2746                           | 3.300(8)  | 154               |
| C(22A) | H(22B) | F(1)     | 2746                           | 3.300(8)  | 150               |
| C(29B) | H(30A) | O(26)    | 2756                           | 3.603(3)  | 138               |
| C(29A) | H(30C) | F(5A)    | 1655                           | 3.465(6)  | 164               |
| C(29A) | H(30C) | F(5B)    | 1655                           | 3.364(5)  | 165               |

2756 = 2-x, 1/2+y, 3/2-z

1655 = 1+x, y, z

2646 = 1-x, -1/2+y, 3/2-z

2746 = 2-x, -1/2+y, 3/2-z

Compound 3

Table S5. Crystal data and structure refinement for 3.

|                                                   |                                                                               |
|---------------------------------------------------|-------------------------------------------------------------------------------|
| <b>Identification code</b>                        | <b>daota_CHO</b>                                                              |
| <b>Empirical formula</b>                          | C <sub>26</sub> H <sub>23</sub> BF <sub>4</sub> N <sub>2</sub> O <sub>2</sub> |
| <b>Formula weight</b>                             | 482.27                                                                        |
| <b>Temperature/K</b>                              | 180.01(10)                                                                    |
| <b>Crystal system</b>                             | monoclinic                                                                    |
| <b>Space group</b>                                | P2 <sub>1</sub> /c                                                            |
| <b>a/Å</b>                                        | 7.8647(3)                                                                     |
| <b>b/Å</b>                                        | 21.0247(5)                                                                    |
| <b>c/Å</b>                                        | 13.4118(4)                                                                    |
| <b>α/°</b>                                        | 90                                                                            |
| <b>β/°</b>                                        | 105.170(3)                                                                    |
| <b>γ/°</b>                                        | 90                                                                            |
| <b>Volume/Å<sup>3</sup></b>                       | 2140.40(12)                                                                   |
| <b>Z</b>                                          | 4                                                                             |
| <b>ρ<sub>calc</sub>/cm<sup>3</sup></b>            | 1.497                                                                         |
| <b>μ/mm<sup>-1</sup></b>                          | 0.998                                                                         |
| <b>F(000)</b>                                     | 1000.0                                                                        |
| <b>Crystal size/mm<sup>3</sup></b>                | 0.177 × 0.073 × 0.025                                                         |
| <b>Radiation</b>                                  | CuKα (λ = 1.54184)                                                            |
| <b>2θ range for data collection/°</b>             | 8.02 to 147.508                                                               |
| <b>Index ranges</b>                               | -9 ≤ h ≤ 9, -26 ≤ k ≤ 26, -16 ≤ l ≤ 16                                        |
| <b>Reflections collected</b>                      | 20330                                                                         |
| <b>Independent reflections</b>                    | 4293 [R <sub>int</sub> = 0.0305, R <sub>sigma</sub> = 0.0219]                 |
| <b>Data/restraints/parameters</b>                 | 4293/102/355                                                                  |
| <b>Goodness-of-fit on F<sup>2</sup></b>           | 1.058                                                                         |
| <b>Final R indexes [I ≥ 2σ (I)]</b>               | R <sub>1</sub> = 0.0711, wR <sub>2</sub> = 0.2063                             |
| <b>Final R indexes [all data]</b>                 | R <sub>1</sub> = 0.0873, wR <sub>2</sub> = 0.2207                             |
| <b>Largest diff. peak/hole / e Å<sup>-3</sup></b> | 0.35/-0.48                                                                    |

Table S6. Hydrogen bonds in 3.

| donor | H      | acceptor | Symmetry code for the acceptor | D...A (Å) | D-H...A angle (°) |
|-------|--------|----------|--------------------------------|-----------|-------------------|
| C(4)  | H(4)   | F(1A)    | 1555                           | 3.030(9)  | 130               |
| C(4)  | H(4)   | F(1B)    | 1555                           | 3.051(11) | 133               |
| C(5)  | H(5)   | O(18)    | 2655                           | 3.109(4)  | 138               |
| C(9)  | H(9B)  | F(4B)    | 4564                           | 3.267(10) | 133               |
| C(15) | H(15)  | O(18)    |                                | 2.774(5)  | 102               |
| C(21) | H(21A) | O(18)    | 4555                           | 3.354(5)  | 141               |
| C(24) | H(24)  | F(2B)    | 2746                           | 3.303(9)  | 144               |
| C(25) | H(25)  | F(4B)    | 2746                           | 3.293(10) | 152               |

2655 = 1-x, 1/2+y, 1/2-z

4555 = x, 1/2-y, 1/2+z

4564 = x, 3/2-y, -1/2+z

2746 = 2-x, -1/2+y, 3/2-z

Compound 4

Table S7. Crystal data and structure refinement for 4.

|                                                   |                                                                  |
|---------------------------------------------------|------------------------------------------------------------------|
| <b>Identification code</b>                        | <b>irene</b>                                                     |
| <b>Empirical formula</b>                          | C <sub>25</sub> H <sub>24</sub> BF <sub>4</sub> N <sub>3</sub> O |
| <b>Formula weight</b>                             | 469.28                                                           |
| <b>Temperature/K</b>                              | 180.15                                                           |
| <b>Crystal system</b>                             | triclinic                                                        |
| <b>Space group</b>                                | P-1                                                              |
| <b>a/Å</b>                                        | 9.5617(6)                                                        |
| <b>b/Å</b>                                        | 10.7543(6)                                                       |
| <b>c/Å</b>                                        | 10.8834(6)                                                       |
| <b>α/°</b>                                        | 79.037(5)                                                        |
| <b>β/°</b>                                        | 74.517(5)                                                        |
| <b>γ/°</b>                                        | 85.404(5)                                                        |
| <b>Volume/Å<sup>3</sup></b>                       | 1058.33(11)                                                      |
| <b>Z</b>                                          | 2                                                                |
| <b>ρ<sub>calc</sub>/cm<sup>3</sup></b>            | 1.473                                                            |
| <b>μ/mm<sup>-1</sup></b>                          | 0.968                                                            |
| <b>F(000)</b>                                     | 488.0                                                            |
| <b>Crystal size/mm<sup>3</sup></b>                | 0.176 × 0.071 × 0.059                                            |
| <b>Radiation</b>                                  | CuKα (λ = 1.54184)                                               |
| <b>2θ range for data collection/°</b>             | 8.378 to 147.412                                                 |
| <b>Index ranges</b>                               | -11 ≤ h ≤ 11, -13 ≤ k ≤ 13, -13 ≤ l ≤ 13                         |
| <b>Reflections collected</b>                      | 15797                                                            |
| <b>Independent reflections</b>                    | 4202 [R <sub>int</sub> = 0.0246, R <sub>sigma</sub> = 0.0208]    |
| <b>Data/restraints/parameters</b>                 | 4202/0/317                                                       |
| <b>Goodness-of-fit on F<sup>2</sup></b>           | 1.036                                                            |
| <b>Final R indexes [I ≥ 2σ (I)]</b>               | R <sub>1</sub> = 0.0492, wR <sub>2</sub> = 0.1282                |
| <b>Final R indexes [all data]</b>                 | R <sub>1</sub> = 0.0607, wR <sub>2</sub> = 0.1385                |
| <b>Largest diff. peak/hole / e Å<sup>-3</sup></b> | 0.55/-0.42                                                       |

Table S8. Hydrogen bonds in 4.

| donor | H      | acceptor | Symmetry code for the acceptor | D...A (Å) | D-H...A angle (°) |
|-------|--------|----------|--------------------------------|-----------|-------------------|
| N(21) | H(21A) | F(4)     | 2765                           | 3.052(2)  | 161               |
| N(21) | H(21B) | F(4)     | 1554                           | 3.067(2)  | 159               |
| C(11) | H(11)  | F(1)     | 2666                           | 3.351(2)  | 160               |
| C(16) | H(16A) | F(3)     | 1554                           | 3.441(3)  | 154               |
| C(16) | H(16B) | N(21)    |                                | 2.919(3)  | 130               |
| C(22) | H(22)  | F(2)     | 2765                           | 3.455(3)  | 168               |

1554 = x,y,-1+z

2765 = 2-x,1-y,-z

2666 = 1-x,1-y,1-z

## Compound 1

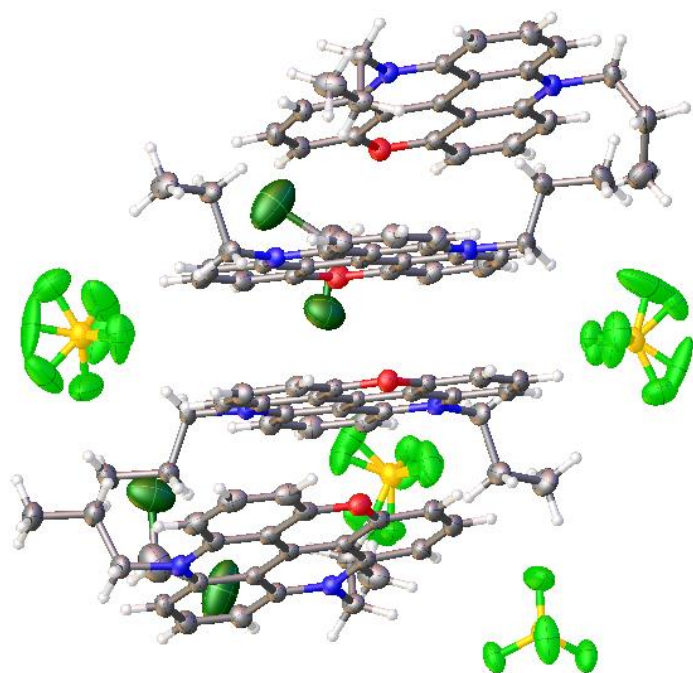

View of the asymmetric unit

The crystal was very small so that the diffraction data are weak. Three of the tetrafluoroborate ions are disordered and were refined using eight fluorine atoms each. Restraints were applied on 1-2 and 1-3 distances (SADI) as well as on anisotropic displacement parameters.

| Compound                                       | 1 (H)                                                                                                       |
|------------------------------------------------|-------------------------------------------------------------------------------------------------------------|
| CCDC                                           | <b>1824707</b>                                                                                              |
| Formula                                        | C <sub>51</sub> H <sub>48</sub> B <sub>2</sub> Cl <sub>2</sub> F <sub>8</sub> N <sub>4</sub> O <sub>2</sub> |
| <i>D</i> <sub>calc.</sub> / g cm <sup>-3</sup> | 1.480                                                                                                       |
| <i>μ</i> / mm <sup>-1</sup>                    | 2.015                                                                                                       |
| Formula Weight                                 | 993.45                                                                                                      |
| Colour                                         | red                                                                                                         |
| Shape                                          | prism                                                                                                       |
| Size / mm <sup>3</sup>                         | 0.18 × 0.05 × 0.04                                                                                          |
| <i>T</i> / K                                   | 180.00(10)                                                                                                  |
| Crystal System                                 | monoclinic                                                                                                  |
| Space Group                                    | P2 <sub>1</sub> /n                                                                                          |
| <i>a</i> / Å                                   | 15.5373(3)                                                                                                  |
| <i>b</i> / Å                                   | 25.9899(4)                                                                                                  |
| <i>c</i> / Å                                   | 22.5918(4)                                                                                                  |
| <i>α</i> / °                                   | 90                                                                                                          |
| <i>β</i> / °                                   | 102.1432(17)                                                                                                |
| <i>γ</i> / °                                   | 90                                                                                                          |
| <i>V</i> / Å <sup>3</sup>                      | 8918.7(3)                                                                                                   |
| <i>Z</i>                                       | 8                                                                                                           |
| <i>Z</i> '                                     | 2                                                                                                           |
| Wavelength / Å                                 | 1.54184                                                                                                     |
| Radiation type                                 | CuK <sub>α</sub>                                                                                            |
| <i>θ</i> <sub>min</sub> / °                    | 3.165                                                                                                       |
| <i>θ</i> <sub>max</sub> / °                    | 73.841                                                                                                      |
| Measured Refl.                                 | 35452                                                                                                       |
| Independent Refl.                              | 17572                                                                                                       |
| Reflections Used                               | 12240                                                                                                       |
| <i>R</i> <sub>int</sub>                        | 0.0218                                                                                                      |
| Parameters                                     | 1362                                                                                                        |
| Restraints                                     | 301                                                                                                         |
| Largest Peak                                   | 0.639                                                                                                       |
| Deepest Hole                                   | -1.230                                                                                                      |
| GooF                                           | 1.025                                                                                                       |
| <i>wR</i> <sub>2</sub> (all data)              | 0.2612                                                                                                      |
| <i>wR</i> <sub>2</sub>                         | 0.2273                                                                                                      |
| <i>R</i> <sub>1</sub> (all data)               | 0.1033                                                                                                      |
| <i>R</i> <sub>1</sub>                          | 0.0785                                                                                                      |

## Compound 2

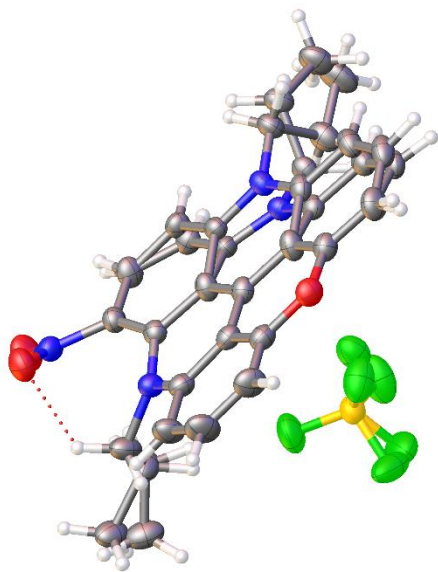

View of the asymmetric unit

The cation is disordered and part of it was refined using 2 components. Geometrical restraints (SADI on 1-2 distances) and restraints on anisotropic displacement parameters were used. A small disorder on the other alkyl arm was also modelled with restraints on 1-2 and 1-3 distances. The BF<sub>4</sub>-anion is also disordered and was refined as 2 parts.

| Compound                                       | 2 (NO <sub>2</sub> )                                                          |
|------------------------------------------------|-------------------------------------------------------------------------------|
| CCDC                                           | 1443634                                                                       |
| Formula                                        | C <sub>25</sub> H <sub>22</sub> BF <sub>4</sub> N <sub>3</sub> O <sub>3</sub> |
| <i>D</i> <sub>calc.</sub> / g cm <sup>-3</sup> | 1.537                                                                         |
| <i>μ</i> /mm <sup>-1</sup>                     | 1.062                                                                         |
| Formula Weight                                 | 499.26                                                                        |
| Colour                                         | red                                                                           |
| Shape                                          | prism                                                                         |
| Size/mm <sup>3</sup>                           | 0.24×0.15×0.13                                                                |
| <i>T</i> /K                                    | 179.95(10)                                                                    |
| Crystal System                                 | monoclinic                                                                    |
| Space Group                                    | P2 <sub>1</sub> /c                                                            |
| <i>a</i> /Å                                    | 9.65357(14)                                                                   |
| <i>b</i> /Å                                    | 12.04731(17)                                                                  |
| <i>c</i> /Å                                    | 18.5986(3)                                                                    |
| <i>α</i> /°                                    | 90                                                                            |
| <i>β</i> /°                                    | 94.0845(14)                                                                   |
| <i>γ</i> /°                                    | 90                                                                            |
| <i>V</i> /Å <sup>3</sup>                       | 2157.52(5)                                                                    |
| <i>Z</i>                                       | 4                                                                             |
| <i>Z</i> '                                     | 1                                                                             |
| Wavelength/Å                                   | 1.54184                                                                       |
| Radiation type                                 | CuK <sub>α</sub>                                                              |
| <i>θ</i> <sub>min</sub> /°                     | 4.376                                                                         |
| <i>θ</i> <sub>max</sub> /°                     | 73.375                                                                        |
| Measured Refl.                                 | 14409                                                                         |
| Independent Refl.                              | 4274                                                                          |
| Reflections Used                               | 3892                                                                          |
| <i>R</i> <sub>int</sub>                        | 0.0177                                                                        |
| Parameters                                     | 439                                                                           |
| Restraints                                     | 193                                                                           |
| Largest Peak                                   | 0.460                                                                         |
| Deepest Hole                                   | -0.415                                                                        |
| GooF                                           | 1.035                                                                         |
| <i>wR</i> <sub>2</sub> (all data)              | 0.1236                                                                        |
| <i>wR</i> <sub>2</sub>                         | 0.1191                                                                        |
| <i>R</i> <sub>1</sub> (all data)               | 0.0491                                                                        |
| <i>R</i> <sub>1</sub>                          | 0.0451                                                                        |

## Compound 3

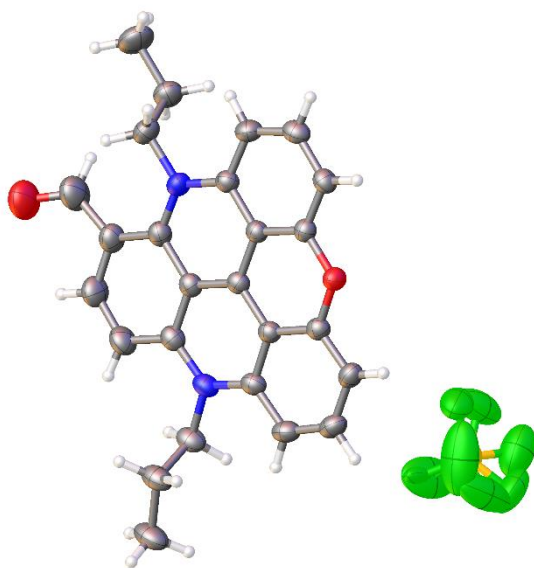

View of the asymmetric unit

The tetrafluoroborate anion is disordered and was modelled using eight fluorine atoms. Restraints (SADI) were used on B-F and F-F distances. The anisotropic displacement parameters were also restrained (RIGU).

| Compound                                       | 3 (CHO)                                                                       |
|------------------------------------------------|-------------------------------------------------------------------------------|
| CCDC                                           | <b>1824709</b>                                                                |
| Formula                                        | C <sub>26</sub> H <sub>23</sub> BF <sub>4</sub> N <sub>2</sub> O <sub>2</sub> |
| <i>D</i> <sub>calc.</sub> / g cm <sup>-3</sup> | 1.497                                                                         |
| $\mu$ /mm <sup>-1</sup>                        | 0.998                                                                         |
| Formula Weight                                 | 482.27                                                                        |
| Colour                                         | red                                                                           |
| Shape                                          | prism                                                                         |
| Size/mm <sup>3</sup>                           | 0.18×0.07×0.03                                                                |
| <i>T</i> /K                                    | 180.01(10)                                                                    |
| Crystal System                                 | monoclinic                                                                    |
| Space Group                                    | P2 <sub>1</sub> /c                                                            |
| <i>a</i> /Å                                    | 7.8647(3)                                                                     |
| <i>b</i> /Å                                    | 21.0247(5)                                                                    |
| <i>c</i> /Å                                    | 13.4118(4)                                                                    |
| $\alpha$ /°                                    | 90                                                                            |
| $\beta$ /°                                     | 105.170(3)                                                                    |
| $\gamma$ /°                                    | 90                                                                            |
| <i>V</i> /Å <sup>3</sup>                       | 2140.40(12)                                                                   |
| <i>Z</i>                                       | 4                                                                             |
| <i>Z</i> '                                     | 1                                                                             |
| Wavelength/Å                                   | 1.54184                                                                       |
| Radiation type                                 | CuK $\alpha$                                                                  |
| $\theta$ <sub>min</sub> /°                     | 4.010                                                                         |
| $\theta$ <sub>max</sub> /°                     | 73.754                                                                        |
| Measured Refl.                                 | 20330                                                                         |
| Independent Refl.                              | 4293                                                                          |
| Reflections Used                               | 3319                                                                          |
| <i>R</i> <sub>int</sub>                        | 0.0305                                                                        |
| Parameters                                     | 355                                                                           |
| Restraints                                     | 102                                                                           |
| Largest Peak                                   | 0.353                                                                         |
| Deepest Hole                                   | -0.481                                                                        |
| Goof                                           | 1.058                                                                         |
| <i>wR</i> <sub>2</sub> (all data)              | 0.2209                                                                        |
| <i>wR</i> <sub>2</sub>                         | 0.2065                                                                        |
| <i>R</i> <sub>1</sub> (all data)               | 0.0873                                                                        |
| <i>R</i> <sub>1</sub>                          | 0.0711                                                                        |

## Compound 4

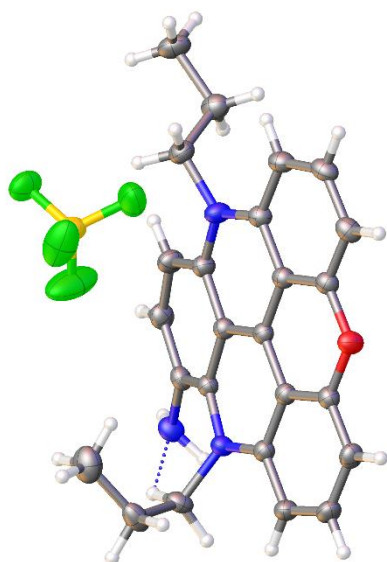

View of the asymmetric unit

|                                                |                                                                  |
|------------------------------------------------|------------------------------------------------------------------|
| <b>Compound</b>                                | <b>4 (NH<sub>2</sub>)</b>                                        |
| <b>CCDC</b>                                    | <b>1824706</b>                                                   |
| Formula                                        | C <sub>25</sub> H <sub>24</sub> BF <sub>4</sub> N <sub>3</sub> O |
| <i>D</i> <sub>calc.</sub> / g cm <sup>-3</sup> | 1.473                                                            |
| $\mu$ /mm <sup>-1</sup>                        | 0.968                                                            |
| Formula Weight                                 | 469.28                                                           |
| Colour                                         | red                                                              |
| Shape                                          | prism                                                            |
| Size/mm <sup>3</sup>                           | 0.18×0.07×0.06                                                   |
| <i>T</i> /K                                    | 180.15                                                           |
| Crystal System                                 | triclinic                                                        |
| Space Group                                    | P-1                                                              |
| <i>a</i> /Å                                    | 9.5617(6)                                                        |
| <i>b</i> /Å                                    | 10.7543(6)                                                       |
| <i>c</i> /Å                                    | 10.8834(6)                                                       |
| $\alpha$ /°                                    | 79.037(5)                                                        |
| $\beta$ /°                                     | 74.517(5)                                                        |
| $\gamma$ /°                                    | 85.404(5)                                                        |
| <i>V</i> /Å <sup>3</sup>                       | 1058.33(11)                                                      |
| <i>Z</i>                                       | 2                                                                |
| <i>Z</i> '                                     | 1                                                                |
| Wavelength/Å                                   | 1.54184                                                          |
| Radiation type                                 | CuK $\alpha$                                                     |
| $\theta$ <sub>min</sub> /°                     | 4.189                                                            |
| $\theta$ <sub>max</sub> /°                     | 73.706                                                           |
| Measured Refl.                                 | 15797                                                            |
| Independent Refl.                              | 4202                                                             |
| Reflections Used                               | 3417                                                             |
| <i>R</i> <sub>int</sub>                        | 0.0246                                                           |
| Parameters                                     | 317                                                              |
| Restraints                                     | 0                                                                |
| Largest Peak                                   | 0.545                                                            |
| Deepest Hole                                   | -0.425                                                           |
| Goof                                           | 1.035                                                            |
| <i>wR</i> <sub>2</sub> (all data)              | 0.1385                                                           |
| <i>wR</i> <sub>2</sub>                         | 0.1282                                                           |
| <i>R</i> <sub>1</sub> (all data)               | 0.0607                                                           |
| <i>R</i> <sub>1</sub>                          | 0.0492                                                           |
